3/25/2019 5:56:00 AM

1 **Circulating Th17.1 cells as candidate for prediction of therapeutic response to**  
2 **abatacept in patients with rheumatoid arthritis: exploratory research**

3 Short title: Prediction of therapeutic response to abatacept using Th17.1 cells

4

5 Shinji Maeda<sup>1\*</sup>, Satoshi Osaga<sup>2</sup>, Tomoyo Maeda<sup>1</sup>, Norihisa Takeda<sup>1</sup>, Shin-ya Tamechika<sup>1</sup>,  
6 Taio Naniwa<sup>1</sup>, Akio Niimi<sup>1</sup>

7

8 <sup>1</sup>Department of Respiratory Medicine, Allergy and Clinical Immunology, Nagoya City  
9 University Graduate School of Medical Sciences, Nagoya 467-8601, Japan

10 <sup>2</sup>Clinical Research Management Center, Nagoya City University Hospital, Nagoya 467-8601,  
11 Japan

12

13

14 \*Corresponding author

15 Email: [snb51961@med.nagoya-cu.ac.jp](mailto:snb51961@med.nagoya-cu.ac.jp) (SM)

16

## 17 **Abstract**

18 T helper 17.1 cells (Th17.1) are highly pathogenic T cells in inflammatory diseases.  
19 This study aimed to identify Th cell biomarkers, including the analysis of Th17.1, that predict  
20 therapeutic response to abatacept in patients with rheumatoid arthritis. The circulating Th  
21 subsets among CD4<sup>+</sup> T lymphocytes in 40 patients with rheumatoid arthritis before abatacept  
22 treatment were determined using multicolor flow cytometry. All patients received abatacept  
23 treatment for 24 weeks, and the change in disease activity score, including 28-joint count  
24 C-reactive protein, and the responsiveness of other indices to abatacept treatment were  
25 evaluated according the European League Against Rheumatism criteria [good responders,  
26 moderate responders, and non-responders]. The correlation between the abatacept responses  
27 and the Th subsets (baseline) was analyzed. Logistic regression analysis with inverse  
28 probability weighting method was conducted to calculate odds ratio adjusted for patient  
29 characteristics. The proportion of baseline Th17.1 cells was significantly lower in patients  
30 categorized as good responders than in those categorized as non-good responders (moderate  
31 responders and non-responders;  $p = 0.0064$ ). The decrease in 28-joint count C-reactive  
32 protein after 24 weeks of abatacept therapy also showed a significant negative correlation  
33 with the proportion of Th17.1 cells. The adjusted odds ratio for achieving good response in  
34 patients with baseline Th17.1 level below the median value was 14.6 (95% confidence  
35 interval, 2.9–72.3;  $p = 0.0021$ ) relative to that in the remaining patients. The proportion of  
36 Th17.1 cells at baseline is a good candidate for the prediction of response to abatacept  
37 treatment. These novel findings may represent an important step in the pursuit of precision  
38 medicine.

39

## 40 **Introduction**

41 Advances in medicine and pharmaceutical technology have led to tremendous  
42 improvements in the treatment of rheumatoid arthritis (RA) [1]. Moreover, research in  
43 clinical human immunology has found new autoimmune cells. The development of potent  
44 anti-rheumatic drugs, particularly biological products, has helped in the improvement of  
45 clinical remission rates [2,3]. The targets of these biologics include both cytokines and T  
46 cells, which play key roles in the pathogenesis of RA. The therapeutic effect of abatacept  
47 (ABA), a strong inhibitor of T cells [4], has been shown to be equivalent to that of tumor  
48 necrosis factor  $\alpha$  (TNF- $\alpha$ ) inhibitor therapy [5-7].

49 The target lymphocytes of ABA, particularly CD4+ T cells, play a central role in the  
50 pathogenesis of RA, particularly in terms of acquired immunity, and in the induction of  
51 autoimmune response [4]. Research conducted on autoimmune mice models [8,9] has  
52 demonstrated the decisive role of Th17 in the pathogenesis of arthritis and autoimmune  
53 diseases. In humans, CCR6, which is a representative surface marker of Th17 [10], is a  
54 disease susceptibility gene of human RA [11]. Th17 is also involved in human RA pathology  
55 [12] by antigenically producing inflammatory cytokines, such as interleukin (IL)-17A,  
56 IL-17F, and IL-22. Unlike mice, these human Th17 cells have subpopulations. In particular,  
57 Th17.1 cells that are CD161+ CXC chemokine receptors (CXCR3)+ interferon- $\gamma$ -producing  
58 Th17 cells, also referred to as classical Th1 or extinguish Th17 (ex-Th17) are a subgroup of  
59 Th17 cells found in humans [13] and are believed to be the most pathogenic among CCR6+  
60 CD4+ T cells [12]. Th17 cells convert to inflammatory Th17.1 cells in an inflammatory  
61 milieu induced by cytokines, such as IL-1 $\beta$ , IL-23, TNF- $\alpha$ , and IL-12 [14]. Th17.1 cells have  
62 high expression levels of P-glycoprotein/multidrug resistance type 1 (MDR-1) and exhibit  
63 glucocorticoid resistance [13]. RA is characterized by joint destruction that is resistant to  
64 steroid treatment alone [15]. It is believed that the glucocorticoid resistance of Th17.1 cells is  
65 not attributable only to the function of MDR-1, and thus, further elucidation of the

66 mechanism is expected in future. ABA is a strong inhibitor of these pathological T cells.

67         Although the therapeutic efficacy of ABA is well demonstrated, some patients are  
68 refractory to ABA treatment. The immune mechanisms that drive the chronicity of synovitis  
69 are multifactorial, such as adoptive immune pathways, innate immune pathways, stromal  
70 pathways, and systemic pathways [16]. Therefore, the contribution of immune factors other  
71 than T cells may influence the efficacy of ABA therapy. Among the various T cell subsets,  
72 some decrease in response to ABA treatment, whereas others do not [17]. ABA treatment has  
73 been reported to markedly reduce the proportion of T follicular helper cells and slightly  
74 decrease Th17 and activated regulatory T cells (Treg) cells. However, few studies have  
75 focused on the relationship between Th17.1 cells and therapeutic response to ABA in patients  
76 with RA. Moreover, there is a need to identify biomarkers that predict the therapeutic  
77 response. Identification of drug-specific biomarkers that predict therapeutic response is a  
78 desirable goal in the realm of personalized medicine [1]. Indeed, advances in cell analysis  
79 technology has raised prospects for the discovery of novel cellular immunological biomarkers  
80 that can predict treatment response in rheumatic diseases [18,19].

81         In the present study, we analyzed the proportion of each Th cell subset, including  
82 CXCR3<sup>+</sup> Th17 cells (Th17.1), in the peripheral blood of patients with active RA before ABA  
83 treatment to explore early cellular biomarkers of response to ABA. We demonstrated the  
84 correlation between the proportion of Th17.1 cells and response to ABA therapy and  
85 proposed its potential use as a biomarker for predicting therapeutic response.

## 86 **Materials and Methods**

87

### 88 **Ethics statement**

89         This research was approved by the Ethics Review Committee of the Graduate School  
90 of Medicine, Nagoya City University. The study was conducted in compliance with the

91 Declaration of Helsinki. Written informed consent was obtained from all patients.

## 92 **Participants**

93 Patients with RA who fulfilled the classification criteria of the 1987 American  
94 College of Rheumatology rheumatoid arthritis classification (revised criteria of classification  
95 of RA) [20] and received ABA treatment at the Nagoya City University Hospital between  
96 2009 to 2015 were eligible for inclusion. Inclusion criteria were as follows: 1) patients who  
97 consented to participate in this research, 2) patients who agreed to provide peripheral blood  
98 mononuclear cells (PBMCs) for immune-phenotyping analysis of Th subsets and Treg using  
99 multicolor flow cytometry, and 3) patients who did not achieve adequate improvement on  
100 previous treatment with at least one conventional synthetic disease-modifying anti-rheumatic  
101 drug (DMARDs).

102 Participants received intravenous ABA at 0 weeks, 2 weeks, 4 weeks, and every 4  
103 weeks thereafter. The dose of ABA was based on body weight (BW) as follows: 500 mg for  
104 patients with a BW of <60 kg and 750 mg for those with a BW of 60 to 100 kg.

105

## 106 **Cell surface and intracellular staining and flow cytometry** 107 **analysis**

108 After obtaining informed consent, we obtained PBMCs of participants at baseline and  
109 at 4 and 24 weeks of ABA treatment. PBMCs were separated by density gradient  
110 centrifugation with Ficoll–Paque Plus (GE Healthcare, Uppsala, Sweden) and resuspended in  
111 flow cytometry buffer (Hank's Balanced Salt Solution supplemented with 2%  
112 heat-inactivated fetal calf serum, 0.05% Sodium Azide, and 0.5% EDTA). Cells were stained  
113 for 30 min at 4°C under darkened conditions with the following fluorochrome labeled  
114 monoclonal antibodies: anti-CD4-AmCyan (Clone SK3, BD Biosciences, Franklin Lakes, Nj,

115 USA), anti-CD25-APCCy7 (Clone M-A251, BD Biosciences), anti-CD45RA-FITC (Clone  
116 HI100, BD Biosciences), anti-Ki67-FITC (Clone B56, BD Biosciences), anti-CD196  
117 (CCR6)-PE-Cyanine7 (Clone R6H1, eBioscience, San Diego, CA, USA), anti-CD161-PE  
118 (Clone HP-3G10, eBioscience), anti-CCR4-Alexa647 (Clone TG6/CCR4, eBioscience),  
119 anti-CD183 (CXCR3)-Pacific Blue (Clone G025H7, BioLegend), anti-forkhead box P3  
120 (Foxp3)-PerCP-Cyamine5.5 (Clone PCH101, eBioscience), rat  
121 immune(Ig)G2a-PerCP-Cyamine5.5 antibody (eBioscience), and anti-CD45RO-APC (Clone  
122 UCHL1, TONBO Biosciences, San Diego, CA, USA). For the intracellular staining of Foxp3  
123 and Ki67, the Foxp3-Staining Buffer Set (fixation/permeabilization and permeabilization  
124 buffers, eBioscience) was used according to the manufacturer's protocol. Stained cells were  
125 washed twice using the flow cytometry buffer and resuspended for analysis using the  
126 Canto-II Flow cytometer (BD Bioscience) and the Diva software (BD Bioscience) and  
127 analyzed with FlowJo software (Tree Star). We defined the Th subset as follows:

128 Treg, CD4<sup>+</sup> CD25<sup>+</sup> Foxp3<sup>+</sup>; nonTreg, CD4<sup>+</sup> Foxp3<sup>-</sup>; Th1, CXCR3<sup>+</sup> CCR4<sup>-</sup> CCR6<sup>-</sup>  
129 nonTreg; Th2, CCR4<sup>+</sup> CXCR3<sup>-</sup> CCR6<sup>-</sup> nonTreg; Th1&2, CXCR3<sup>+</sup> CCR4<sup>+</sup> CCR6<sup>-</sup>  
130 nonTreg; Th17, CCR6<sup>+</sup> CD161<sup>+</sup> CCR4<sup>+</sup> CXCR3<sup>-</sup> nonTreg; and Th17.1, CCR6<sup>+</sup> CD161<sup>+</sup>  
131 CXCR3<sup>+</sup> CCR4<sup>-</sup> nonTreg.

132

### 133 **Clinical assessment and evaluation of therapeutic response**

134 Data pertaining to the following demographic and clinical variables were obtained  
135 from the medical records: age, sex, disease duration, use of corticosteroids,  
136 disease-modifying anti-rheumatic drugs, non-steroidal anti-inflammatory drugs, tender joint  
137 count, swollen joint count, patient global assessment [patient visual analog scale, 0–100 mm],  
138 physician global assessment [doctor's visual analog scale, 0–100 mm], C-reactive protein  
139 (CRP) level, matrix metalloproteinase-3 (MMP-3) level, rheumatoid factor (RF) level, and

140 anti-citrullinated protein/peptide antibody (ACPA) level.

141 Disease activity was assessed by calculating DAS28-CRP for each patient at each  
142 visit. The DAS28-CRP was calculated, and patients were categorized into the following four  
143 groups: remission, low (LDA), moderate (MDA), or high (HDA) disease activity according  
144 to the recommended formula  
145 ([https://www.das-score.nl/das28/en/difference-between-the-das-and-das28/how-to-measure-t](https://www.das-score.nl/das28/en/difference-between-the-das-and-das28/how-to-measure-the-das28/how-to-calculate-the-das28/alternative-validated-formulae.html)  
146 [he-das28/how-to-calculate-the-das28/alternative-validated-formulae.html](https://www.das-score.nl/das28/en/difference-between-the-das-and-das28/how-to-measure-the-das28/how-to-calculate-the-das28/alternative-validated-formulae.html)). Because  
147 DAS28-CRP values are reportedly lower than those obtained in the original DAS28  
148 assessment using erythrocyte sedimentation rate, a threshold of 4.1 (instead of the original  
149 5.1) was used as the cut-off for HDA; 2.7 (instead of 3.2) as the cut-off for low disease LDA;  
150 and 2.3 (instead of 2.6) as the cut-off for remission [21]. The therapeutic response to ABA at  
151 24 weeks was evaluated using the European League Against Arthritis (EULAR) response  
152 criteria  
153 ([https://www.das-score.nl/das28/en/difference-between-the-das-and-das28/importance-of-das](https://www.das-score.nl/das28/en/difference-between-the-das-and-das28/importance-of-das-28-and-tight-control/eular-response-criteria.html)  
154 [28-and-tight-control/eular-response-criteria.html](https://www.das-score.nl/das28/en/difference-between-the-das-and-das28/importance-of-das-28-and-tight-control/eular-response-criteria.html)), with 4.1 and 2.7 used as the thresholds for  
155 HDA and LDA, respectively. Briefly, patients were classified into three groups based on their  
156 6-month DAS28-CRP and their absolute change from baseline according to the EULAR  
157 criteria as no response, moderate response, or good response. A good responder must  
158 demonstrate improvement of at least 1.2 units and achieve an absolute DAS28-CRP score of  
159  $<2.7$ . A non-responder must demonstrate an improvement of  $\leq 0.6$  and have a final  
160 DAS28-CRP score of  $>4.1$ . Moderate responses fall between these data points. Furthermore,  
161 responsiveness to ABA treatment was evaluated using the following indicators: changes in  
162 disease activity before and after ABA treatment ( $\Delta$ DAS28-CRP 0–24 weeks) and the  
163 evaluation of disease activity after 24 weeks of ABA treatment (remission, LDA, MDA,  
164 HDA).

165 After the initiation of ABA therapy, the clinical course was followed up for 24 weeks  
166 (every 4 weeks), and the correlation between responses to ABA treatment, RA disease  
167 activity, and the baseline proportion of Th subsets among CD4<sup>+</sup> T lymphocytes (before  
168 treatment) was analyzed.

169

## 170 **MDR-1 activity assay**

171 For the analysis of the MDR-1 activity of T cells, the fluorescent dye rhodamin 123  
172 (Rh-123) was used according to the methods reported elsewhere [13]. Briefly, total CD4<sup>+</sup> T  
173 cells were isolated using the Dynabeads CD4 positive T cell isolation kit (Invitrogen).  
174 Purified cells were 95%–98% pure as determined by flow cytometry analysis. Purified T cells  
175 in complete medium [DMEM (Gibco) supplemented with 10% FBS, 1% L-glutamine, 1%  
176 sodium pyruvate, 1% HEPES, and 1% Pen-Strep (all from Gibco) were loaded with Rh-123  
177 (Sigma-Aldrich) at a final concentration of 1 µg/mL for 30 min on ice. Cells were then  
178 washed and moved to a 37°C incubator for 2 h. After an efflux period, cells were washed on  
179 ice in PBS, stained with surface markers (CD4, CD45RO, CXCR3, CCR6, and CD161), and  
180 washed again in PBS, and stained cells were kept on ice prior to flow cytometry analysis.  
181 Fluorescence reduction due to the emission of fluorescent dye by MDR-1 was confirmed by  
182 flow cytometry. For a negative control, 1 µM cyclosporine A (Sigma-Aldrich) was added to  
183 cells immediately before the incubation step.

184

## 185 **Statistical analysis**

186 Mann–Whitney U test was used to assess between-group differences with respect to  
187 continuous variables, and Fisher’s exact test was used to assess between-group differences  
188 with respect to categorical variables. Kruskal–Wallis test was used for the analysis of  
189 differences in continuous variables between three groups. Friedman rank sum test and



190 Wilcoxon signed rank test were used to analyze sequential changes in the proportion of each  
191 Th subset among CD4+ lymphocytes (0, 4, and 24 weeks) and Ki67 expression in each Th  
192 subset (0 and 4 weeks). Spearman rank correlation coefficient was used to assess correlation  
193 between two continuous variables. Stepwise variable selection method based on Akaike's  
194 Information Criterion, Bayesian information criterion, and p-value was performed to identify  
195 the candidate Th subset that predicted ABA response.

196 The enrolled patients (n = 40) were divided into two groups based on the median  
197 proportion of Th17.1 cells among CD4+ T cells: Th17.1-lower (n = 20) and Th17.1-higher (n  
198 = 20).

199 To minimize the potential confounding effect due to baseline differences in patient  
200 characteristics between Th17.1-lower and higher groups, the inverse probability weighting  
201 (IPW) method, which is an application of the propensity score [22-24], was applied to  
202 compare the DAS28-CRP and good response rate of ABA treatment between the groups.  
203 Propensity scores for the IPW method were estimated using multivariate logistic regression  
204 analysis with the Th17.1 status (lower or higher) as the dependent variable and using the  
205 following baseline characteristics as independent variables: age, sex, DAS28-CRP (baseline),  
206 RF, ACPA RA disease duration (years), history of biological DMARDs, prescription of  
207 methotrexate (MTX), and glucocorticoids. The discriminative power of the propensity score  
208 was quantified by the c statistic corresponding to the area under the receiver operating  
209 characteristic curve. Next, each patient background variable was compared under the  
210 correction by the IPW method using the weighted Mann–Whitney test, the weighted *t*-test,  
211 and the weighted chi-squared test, and the respective p-values were calculated. The effect of  
212 Th17.1 on patient ABA response was evaluated using estimated odds ratios (OR) and 95%  
213 confidence intervals (CIs). All calculated p-values were two-sided, and p-values < 0.05 were  
214 considered statistically significant for all analyses. Statistical analyses were performed with

215 the R-software version 3.3.3 (R Development Core Team, Vienna, Austria) and EZR version  
216 1.35 (Saitama Medical Center, Jichi Medical University, Saitama, Japan) [25], which is a  
217 graphical user interface for R (The R Foundation for Statistical Computing, Vienna, Austria).  
218 The following R-software packages were used for statistical processing and creation of  
219 graphs and tables: survey (version 3.31-5) [26], aod (version 1.3), weights (version 0.85),  
220 ggplot2 [27], and corrplot (version 0.77).

221

## 222 **Results**

223

### 224 **Baseline characteristics of patients**

225 Table 1 shows the baseline demographics and clinical characteristics of the enrolled  
226 patients (N = 40). The disease activity of RA was high in the study population (median  
227 DAS28-CRP, 4.43; simplified disease activity index, 23.8). ACPA-positive patients  
228 accounted for 60% of the study population, and they were relatively older (median age, 70.5  
229 years). With respect to use of concomitant drugs, 77.5% of the patients were taking MTX,  
230 whereas 60% were taking glucocorticoids. With respect to medication history, only 32.5% of  
231 the patients had a history of treatment with biological DMARDs.

232 **Table 1. Clinical characteristics of patients at baseline.**

---

| Patient characteristics | Overall n = 40<br>Median [IQR], or, (%) |
|-------------------------|-----------------------------------------|
|-------------------------|-----------------------------------------|

---

|                                                          |                      |
|----------------------------------------------------------|----------------------|
| Age, year old                                            | 70.5 [60.8, 74.6]    |
| Sex: male/female, (%)                                    | 8/32 (20.0/80.0)     |
| Disease duration (years)                                 | 4.2 [1.5, 15.9]      |
| DAS28-CRP                                                | 4.43 [4.02, 5.01]    |
| SDAI score                                               | 23.8 [20.3, 28.8]    |
| CRP, mg/dl                                               | 1.02 [0.48, 2.27]    |
| MMP-3 (ng/ml)                                            | 167.7 [100.2, 290.2] |
| ACPA (negative/positive, (%))                            | 16/24 (40.0/60.0)    |
| negative, (%)                                            | 16 (40.0)            |
| Low positive, (%)                                        | 5 (12.5)             |
| High positive, (%)                                       | 19 (47.5)            |
| RF (negative/positive, (%))                              | 14/26 (35.0/65.0)    |
| negative, (%)                                            | 14 (35.0)            |
| Low positive, (%)                                        | 9 (22.5)             |
| High positive, (%)                                       | 17 (42.5)            |
| Concomitant methotrexate, n (%)                          | 31 (77.5)            |
| MTX mg ( mean (sd))                                      | 9.4 (2.9)            |
| Concomitant glucocorticoid, n (%)                        | 24 (60.0)            |
| prednisolone, mg (mean, (sd))                            | 5.8 (3.6)            |
| Concomitant tacrolimus, n (%)                            | 3 ( 7.5)             |
| Concomitant NSAIDs, n (%)                                | 20 (50.0)            |
| Biologic DMARDs naïve, n (%)                             | 27 (67.5)            |
| <u>Pulmonary complications associated with RA, n (%)</u> | <u>18 (45.0)</u>     |

233

234 This table shows patient baseline demographics. Data are presented as median [IQR,  
235 interquartile range], mean [SD], or frequency [%].

236 DAS28-CRP, disease activity score 28-joint count C-reactive protein; SDAI, simplified  
237 disease activity index; CRP, C-reactive protein; NSAIDs, non-steroidal anti-inflammatory  
238 drugs; MMP-3, matrix metallo-proteinase 3; ACPA, anti-citrullinated protein antibody; RF,  
239 rheumatoid factor; MTX, methotrexate; DMARDs, disease modified anti-rheumatic-drug;  
240 Low positive, less than 3 times normal upper limit among positive; High positive, more than  
241 3 times the normal upper limit.

242 Between-group differences with respect to median values determined using the Mann–  
243 Whitney U test, whereas those with respect to percentage values were determined using the  
244 Fisher’s exact test.

245

## 246 **Characterization of Th17.1 in patients with RA**

247 We analyzed the subtype of peripheral blood T cells before and four weeks after ABA  
248 treatment (Fig 1a); furthermore, in each cell group, Ki67 expression was determined by flow  
249 cytometry as a cell proliferation marker.

250 Th17.1 was the smallest subset of CD4+ cells (median 1.17%; interquartile range  
251 0.71–1.93) (S1 Fig). Next, the expression of MDR-1, one of the major features of Th17.1,  
252 was confirmed using Rh-123 (Fig 1b). The results showed that MDR-1 was highly expressed  
253 only in Th17.1 cells and not in the Th1 and Th17 cells, as reported so far. The expression rate  
254 of CD28, an inhibitory target in ABA treatment, in the Th17.1 cells was as high as that in the  
255 others (>99%) (Fig 1c).

256

257 **Fig 1. Characteristic of circulating Th17.1 cells in patients with rheumatoid arthritis**

258 **(RA)**. a. Flow cytometry plots explaining the gating strategy for the identification of  
259 peripheral blood Treg, Th1, Th2, Th1&2, Th17, and Th17.1 subpopulations. CD4<sup>+</sup> T cell  
260 subsets in the peripheral blood of adult patients with RA were analyzed using flow  
261 cytometry. b. The MDR1 activity of indicated Th subset assessed using multicolor flow  
262 cytometry with rhodamine 123 (Rh-123). Total CD4<sup>+</sup> T cells isolated from peripheral blood  
263 were labeled with Rh123. After a 1-h efflux period at 37°C in the presence of vehicle  
264 (Dimethyl sulfoxide) or MDR1 inhibitors (cyclosporine A), cells were stained with  
265 antibodies to CCR6, CXCR3, and CD45RO, and Rh-123 efflux of each Th subsets was  
266 analyzed using flow cytometry. Data shown are flow cytometry plots representing three  
267 independent experiments performed on cells isolated from different donors with RA. c.  
268 Proportion of cells with CD28 expression within the indicated CD4<sup>+</sup> T cell subpopulations of  
269 patients with RA. Data are representative of at least three independent experiments.

270

## 271 **Difference between early changes in proliferation status of Th** 272 **subsets**

273 Changes in the proportions of Th subset among CD4<sup>+</sup> T cells before ABA treatment  
274 and 4 weeks after treatment were confirmed to evaluate the effect of ABA treatment on each  
275 Th subset. However, noticeable changes were not observed (Fig 2a). Therefore, we next  
276 analyzed the expression of Ki67 in the cells to confirm the early effects of ABA on each Th  
277 cell subset (Fig 2b). Before ABA treatment, the proportion of Ki67 positive cells among each  
278 Th subset was different; particularly, the expression rate in Th17.1 cells was remarkably  
279 lower than that in the other subsets (S2 Fig, Figs 2b and 2c). In contrast, the expression rate  
280 of Ki67 in Treg cells was relatively higher, which suggests that Treg is active during cell  
281 proliferation in patients with RA. Next, the Ki67 positivity rate for each Th subset was  
282 determined after ABA treatment for 4 four weeks and compared with the baseline. In only 4

283 weeks, the proportion of Ki67 positive cells was significantly reduced in all subsets other  
284 than the Th17.1 cells (Fig 2c). The change in Ki67 expression in Th17.1 cells was not  
285 statistically significant ( $p = 0.39$ ).

286

287 **Fig 2. Early change in cell proliferation state of each Th subset by ABA treatment.**

288 Peripheral blood mononuclear cells of patients with RA were obtained at baseline and at 4  
289 and 24 weeks of abatacept treatment (0 and 4 weeks,  $n = 40$ ; 24 weeks,  $n = 29$ ).

290 a. Sequential changes in the proportion of each T cell subset among CD4 T cells in peripheral  
291 blood induced by ABA treatment. Data were analyzed using Friedman rank sum test.

292 b. Flow cytometry plot showing the frequency of Ki67 expression in the indicated CD4+ Th  
293 cells in patients with RA assessed using intracellular staining of Ki67 antigen and analyzed  
294 using multicolor flow cytometry.

295 c. Sequential changes in the proportion of Ki67 expression in each Th subsets induced by  
296 ABA treatment (0 and 4 weeks,  $n = 40$ ).

297 Data were analyzed using Wilcoxon signed rank test.

298

299 **Therapeutic response to ABA and baseline Th17.1**

300 ABA treatment was continued for 24 weeks, and the progress of disease activity in  
301 each patient and the responsiveness to ABA treatment were evaluated. Subsequently, we  
302 analyzed the correlation between ABA response and the Th subset at baseline. A remarkable  
303 finding was that the proportion of baseline Th17.1 cells among CD4+ T cells in good  
304 responders was significantly lower than that in poor responders ( $p = 0.0064$ ) (Fig 3a). In  
305 contrast, no significant difference was observed with respect to the other Th subsets.

306 The attenuation of disease activity ( $\Delta$ DAS28-CRP) after 24 weeks of ABA treatment  
307 also showed a significant negative correlation with Th17.1 (both percentage and absolute

308 number) (Fig 3b).

309

310 **Fig 3. Clinical significance of Th17.1 levels in abatacept treatment response.** ABA

311 treatment was continued for 24 weeks. Subsequently, correlation between ABA response and

312 the Th subset at baseline was analyzed. The following indicators were used to evaluate

313 response to ABA treatment: changes in DAS28-CRP scores from baseline at 24 weeks after

314 ABA treatment ( $\Delta$ DAS28-CRP 24 weeks), disease activity evaluation after 24-week ABA

315 treatment [remission and low (LDA), moderate (MDA), and high (HDA) disease activity],

316 and treatment response evaluation using the EULAR response criteria [good responder (GR),

317 moderate responder (MR), and non-responder (NR)]. a. ABA treatment response after 24

318 weeks was evaluated as GR (n = 14), MR (n = 13), and NR (n = 13). The proportion of

319 indicated Th subsets among CD4 + lymphocytes at baseline in each group was plotted and

320 displayed as box plot. b. Scatter plot shows the ratio or absolute number of Th17.1 cells at

321 baseline and  $\Delta$ DAS28-CRP 24 weeks. Regression line (red line) and 95 CI of the regression

322 line (gray zone) are also shown in the plot. c. d. Patients were stratified into three groups

323 (low, intermediate, and high) based on tertiles of the proportion of Th17.1. Hundred

324 percentage stacked bar chart shows the EULAR response rate (c) and the disease activity

325 score (d) at 24 weeks after the initiation of ABA treatment in three groups. Data were

326 analyzed using the Kruskal–Wallis and Mann–Whitney tests for between-groups comparisons

327 with Bonferroni correction (a), Spearman’s rank correlation coefficient (b), and Fisher’s

328 exact test and Bonferroni correction for paired comparisons (c, d).

329

330 To assess the clinical relevance of the correlation between Th17.1 cells and ABA

331 response, we divided the patients into two groups (lower and higher) using the median Th

332 17.1 proportion (/CD4+) as cut-off (Table 2), and into three groups (lowest, intermediate, and

333 highest) based on tertiles. ABA treatment response in each group was analyzed. Treatment  
 334 response was significantly different in the three groups ( $p = 0.019$ ) (Fig 3c). The treatment  
 335 response in the Th17.1-lower (lowest) group was significantly better than that in the higher  
 336 (highest) group (S3a–S3b Figs). On analysis of the trend of disease activity at 24 weeks, a  
 337 lower proportion of Th17.1 cells at baseline was associated with a higher percentage of  
 338 remission (Fig 3d). Remission rates in the Th17.1-lower and lowest groups were 55% and  
 339 57.1%, respectively, and no remission was observed in the higher and highest groups.

340

341 **Table 2. Clinical characteristics of the Th17.1-lower and Th17.1-higher patients at**  
 342 **baseline**

| Patient characteristics           | Th17.1 / CD4+ T cells |                     | P    |
|-----------------------------------|-----------------------|---------------------|------|
|                                   | Lower<br>n = 20       | Higher<br>n = 20    |      |
| Age, year old                     | 70.5 [60.8, 74.2]     | 71.0 [63.4, 74.7]   | 1.00 |
| Sex: male/female, (%)             | 6/14 (30.0/70.0)      | 2/18 (10.0/90.0)    | 0.24 |
| Disease duration (years)          | 3.4 [0.9, 6.4]        | 6.7 [2.5, 19.1]     | 0.07 |
| DAS28-CRP                         | 4.50 [3.77, 4.91]     | 4.43 [4.22, 5.02]   | 0.71 |
| SDAI score                        | 22.8 [18.5, 28.7]     | 24.3 [21.6, 29.2]   | 0.31 |
| CRP, mg/dl                        | 1.18 [0.57, 2.52]     | 0.82 [0.48, 2.16]   | 0.81 |
| MMP-3 (ng/ml)                     | 206.3 [104.6, 316.1]  | 152.2 [94.8, 267.8] | 0.50 |
| ACPA (negative/positive, (%))     | 9/11 (45.0/55.0)      | 7/13 (35.0/65.0)    | 0.75 |
| negative, (%)                     | 9 (45.0)              | 7 (35.0)            |      |
| Low positive, (%)                 | 3 (15.0)              | 2 (10.0)            | 0.67 |
| High positive, (%)                | 8 (40.0)              | 11 (55.0)           |      |
| RF (negative/positive, (%))       | 7/13 (35.0/65.0)      | 7/13 (35.0/65.0)    | 1.00 |
| negative, (%)                     | 7 (35.0)              | 7 (35.0)            |      |
| Low positive, (%)                 | 5 (25.0)              | 4 (20.0)            | 1.00 |
| High positive, (%)                | 8 (40.0)              | 9 (45.0)            |      |
| Concomitant methotrexate, n (%)   | 17 (85.0)             | 14 (70.0)           | 0.45 |
| MTX mg ( mean (sd))               | 10.2 (2.5)            | 8.3 (3.1)           | 0.07 |
| Concomitant glucocorticoid, n (%) | 13 (65.0)             | 11 (55.0)           | 0.75 |



|                                                   |           |           |      |
|---------------------------------------------------|-----------|-----------|------|
| prednisolone, mg (mean, (sd))                     | 5.5 (4.3) | 6.1 (3.0) | 0.72 |
| Concomitant tacrolimus, n (%)                     | 0 (0.0)   | 3 (15.0)  | 0.23 |
| Concomitant NSAIDs, n (%)                         | 10 (50.0) | 10 (50.0) | 1.00 |
| Biologic DMARDs naïve, n (%)                      | 14 (70.0) | 13 (65.0) | 1.00 |
| Pulmonary complications associated with RA, n (%) | 7 (35.0)  | 11 (55.0) | 0.34 |

---

343 Enrolled patients (n = 40) were stratified into two groups based on the median proportion of  
344 Th17.1 cells among CD4+ T cells: Th17.1-lower (n = 20) and Th17.1-higher (n = 20). The  
345 table shows clinical features and differences of patient subgroups of Th17.1-lower and  
346 Th17.1-higher at baseline. Data presented as median [IQR, interquartile range] or mean [SD],  
347 or frequency [%].

348 DAS28-CRP, disease activity score 28-joint count C-reactive protein; SDAI, simplified  
349 disease activity index; CRP, C-reactive protein; NSAIDs, non-steroidal anti-inflammatory  
350 drugs; MMP-3, matrix metallo- proteinase 3; ACPA, anti-citrullinated protein antibody; RF,  
351 rheumatoid factor; MTX, methotrexate; DMARDs, disease modified anti-rheumatic-drug;  
352 Low positive, less than 3 times normal upper limit among positive; High positive, more than  
353 3 times the normal upper limit.

354 Between-group differences with respect to median values determined using Mann–Whitney  
355 U test, and those with respect to percentage values determined using Fisher’s exact test.

356

357 We assessed whether changes in objective biomarkers of arthritis [serum CRP,  
358 MMP-3] after ABA treatment for 24 weeks were different between the Th17.1 lower and  
359 higher groups. A significant reduction in serum CRP (S4a Fig) and MMP-3 levels (the  
360 significant high-titer class) was observed in the Th17.1-lower group (S4b and S4c Figs).

361

362 **Fig 4. Prediction of therapeutic response to ABA based on the proportion of Th 17.1 at**

363 **baseline.** a. The difference in ABA therapeutic response between Th17.1-lower (binary by

364 median) and Th17.1-higher after adjustment of patient background factors using inverse  
365 probability weighting (IPW). The size of the balloon plot indicates the weighting using the  
366 IPW method in each case. The red lines indicate the weighted mean (horizontal line) and SD  
367 (vertical line) after IPW adjustment. Black lines indicate non-weighted mean (horizontal line)  
368 and SD (vertical line). Data were analyzed using the weighted (red) or non-weighted (black)  
369 *t*-test. b. The adjusted odds ratio for achievement of GR with baseline Th17.1-lower relative  
370 to Th17.1-higher. Logistic regression analysis using the IPW method to calculate the odds  
371 ratio adjusted for patient characteristics. Forest plot shows unadjusted and adjusted odds  
372 ratios and 95% CI and p-value.

373 ABA, abatacept; IPW, inverse probability weighting; SD, standard deviation; OR, odds ratio;  
374 CI, confidence interval

375

376 Subsequently, we performed receiver operating characteristic curve analysis to  
377 determine the optimal threshold level of Th17.1 associated with good response or remission  
378 at 24 weeks (S5 Fig). A cut-off level of 1.09% (Th17.1 cells/CD4+ cells) was associated with  
379 79.2% sensitivity and 81.2% specificity for GR and 75.9% sensitivity and 100% specificity  
380 for remission.

381

## 382 **Th17.1 and patient background factors**

383 Differences in the clinical features between the Th17.1-lower and Th17.1-higher  
384 groups at baseline were evaluated; however, no significant differences were observed. Next,  
385 because CD4+ T cells play an important role in the pathogenesis of RA, we assessed the  
386 correlation between various patient characteristics, disease activity, Th subset, and ABA  
387 therapeutic response using Spearman's rank correlation coefficient (S6 Fig). The baseline  
388 disease activity (DAS28-CRP baseline) showed a strong correlation with serum CRP, ACPA,

389 RF, and MMP-3 levels. In the Th subset, although baseline disease activity showed a  
390 negative correlation with Treg, no significant correlation was observed with other Th subsets.  
391 The disease duration of RA showed a positive correlation between Th1&2, Th17, and Th17.1  
392 cells. In the Th subset analysis, Th17.1 showed a strong correlation with Th1 and Th17.  
393 Analysis of the correlation between patient characteristics and ABA response revealed a  
394 strong correlation of  $\Delta$ DAS28-CRP (0–24 weeks) with baseline DAS28-CRP and age.  
395 However, none of the patient characteristics showed a significant correlation with EULAR  
396 response criteria and disease activity after 24 weeks (S6 Fig, S1 Table). Therefore, in this  
397 study, we found no meaningful association between the background characteristics of  
398 patients and therapeutic response to ABA. However, baseline levels of Th17.1 and Th17  
399 subsets showed a significant association with all three indices of ABA response, and baseline  
400 Th1 level was significantly associated only with disease activity after 24 weeks. Among these  
401 three Th subsets, the Th17.1 subset showed the most significant association with ABA  
402 response.

403       Among the patient background factors and Th subsets, we selected and narrowed  
404 down the candidate variables to construct an optimal model for prognostic prediction using  
405 stepwise variable selection in multivariate analysis (S2 Table). In all multivariate analyses,  
406 only Th17.1 was selected and showed the most significant association after adjustment for  
407 potential confounders. Given the limited number of cases for adjusting confounding factors  
408 by multivariate analysis, we used the IPW method to reduce the number of confounders and  
409 to analyze the adjusted effect of baseline Th17.1 on ABA therapeutic response.—The c  
410 statistic, the discriminative power of propensity score (PS) for Th17.1-lower group was 0.735  
411 (95% CI 0.576–0.894). With IPW, all patient background factors that are shown in S3 Table  
412 were more evenly adjusted between Th17.1-lower and higher, including RA disease duration,  
413 which was not significantly different but tended to correlate. Of note, even after adjustment

414 for different covariate distributions for both groups, there was a significant difference  
415 between Th17.1-lower and higher groups with respect to  $\Delta$ DAS28-CRP (0–24 weeks) and  
416 disease activity after 24 weeks (DAS28-CRP 24 weeks) (Fig 4a). The effect of Th17.1-lower  
417 on ABA good response as compared to that of Th17.1-higher was evaluated by estimated OR  
418 with 95% CIs, after adjustment by IPW. In this study, good responders and patients with low  
419 disease activity after 24 weeks were equivalent. As a result, in the Th17.1-lower group, OR  
420 for achieving good response was 14.6 (95% CI, 2.9–72.3;  $p = 0.0021$ ) (Fig 4b, S4 Table).  
421 The proportion of Th17.1 cells among CD4+ T cells at baseline was a good predictor of ABA  
422 treatment response.

423

## 424 **Discussion**

425 In the present study, we found that baseline Th17.1 levels may be a prognostic predictor of  
426 ABA treatment in patients with RA. Th17 also correlated with ABA therapeutic response;  
427 however, Th17.1 showed a stronger correlation with ABA therapeutic response. Among Th  
428 cells that cause antigen-specific responses, the identification of cells that correlate with ABA  
429 therapeutic response is the most novel finding of this study.

430 A key novelty aspect of this study was the inclusion of analysis of cell surface  
431 CD161, intracellular forkhead box P3 (Foxp3), and Ki 67 in flow cytometry analysis.  
432 Although CD161 is not included as a surface marker in the international standard human  
433 immune-phenotyping method [28], it is particularly important as a surface marker of  
434 pathogenic Th17 and Th17.1 subsets. In addition, CCR6 and CCR4 are also expressed in  
435 Treg; therefore, intracellular Foxp3 was stained to precisely exclude regulatory T cells.  
436 Analysis of the expression of Ki67 allowed us to capture the early change in cell proliferation  
437 status of each Th subset induced by ABA treatment. When compared with the reported  
438 standard method, there are certain limitations in the interpretation of this research method and

439 results; however, it is important to analyze Th17.1 more precisely.

440 In this study, Th17.1 showed a significant correlation with the patient background  
441 characteristics such as disease duration. Even after adjustment for patient background  
442 characteristics using the IPW method, the baseline proportion of Th17.1 subset significantly  
443 predicted ABA responsiveness. For the identification of cellular immunological biomarkers  
444 that predict therapeutic response by flow cytometric analysis, adjustment for patient  
445 background characteristics is important because target cells themselves may interact with  
446 patient background factors other than therapeutic effect. However, because of the limited  
447 number of samples owing to the handling of living cells and the associated cost burden, it is  
448 difficult to adjust for confounding factors using multivariate analysis. In such settings, the use  
449 of the IPW method to adjust for patient background characteristics is a well-accepted  
450 practice.

451 Previous studies have found only few factors that adequately predict the therapeutic  
452 response to ABA in RA treatment. These include CRP [29], presence or absence of MTX  
453 combination, history of use of other biologics [30], positivity for ACPA and RF [31], and age  
454 [32]. In this study, no significant correlation was observed between these known baseline  
455 patient characteristics and the proportion of peripheral blood Th17.1 cells. None of the  
456 known patient characteristics was found to predict ABA treatment response. Furthermore, the  
457 following lymphocyte-related indices, which are independent of Th17.1, were reported as  
458 prognostic factors: proportion of terminally differentiated effector memory cells among CD8  
459 T cells [33] and the proportion of CD28 negative T cells [34,35]. However, these lymphocyte  
460 subsets were not analyzed in this study. Therefore, the correlation between these known  
461 lymphocytes and Th17.1 was not clarified, which is a study limitation.

462 Our data also showed interesting results pertaining to intracellular Ki67 expression in  
463 each Th subset. The expression level of Ki67 in Th17.1 cells at baseline was significantly

464 lower than that in the other subsets. Moreover, the positivity rate of Ki67 in Th subsets,  
465 except for Th17.1, decreased markedly in the early stage of ABA treatment. These findings  
466 suggest that Th17.1 is less susceptible to ABA with respect to cell proliferation. Considering  
467 that the mechanism of action of several immunosuppressive drugs (such as DMARDs)  
468 involves the inhibition of lymphocyte proliferation, immunosuppressive drugs are less likely  
469 to target Th17.1 because Th17.1 is non-proliferating in active patients with RA undergoing  
470 conventional synthetic therapy with DMARDs.

471 In contrast to Th17.1 cells, the difference in Treg levels did not predict the response to  
472 ABA treatment despite the difference in Treg proportions in the patients at baseline.  
473 Immunological mechanisms of RA pathology, such as the disruption of autoimmune  
474 tolerance, onset and persistence of inflammation, and joint destruction, are extremely  
475 complex. Even in the contribution of T cells to the persistence of inflammation, the  
476 importance of the involvement of dysfunction in the suppression (regulatory) side, such as  
477 Treg, and the existence of inflammatory T cells that can resist Treg suppression is also  
478 conceivable. Treg expresses cytotoxic T-lymphocyte antigen-4 (CTLA-4) [36], which is an  
479 immunosuppressive functional molecule common to both Treg and ABA. It was inferred that  
480 the inactivation of the immune system by CTLA-4-Ig strongly supplemented the difference in  
481 the amount of Treg and the influence of endogenous Treg for the arthritis condition will be  
482 reduced. In contrast, when inflammatory cells that are resistant to suppression by these  
483 CTLA-4 molecules are present at baseline, these levels are likely to affect disease activity  
484 after the ABA treatment.

485 These results pose a simple question of whether Th17.1 has a causal relationship with  
486 treatment resistance. In previous reports, Th17.1 cells were described as the most pathologic  
487 inflammatory cells among the CCR6 positive T cells [12]. Both Th17 and Th17.1 cells are  
488 present in the synovial fluid of patients with RA; however, Th17.1 cells are particularly more

489 abundant in the synovial fluid than in the peripheral blood [37]. Compared with Th1 and  
490 Th17, Th17.1 cells produce more types of pro-inflammatory cytokines, such as IL-17A,  
491 granulocyte macrophage colony-stimulating factor, interferon- $\gamma$ , and TNF- $\alpha$ , which are  
492 associated with rheumatoid inflammatory conditions. More specifically, treatment with the  
493 neutralizing antibody of the inflammatory cytokine granulocyte macrophage  
494 colony-stimulating factor, which is strongly produced by Th17.1, is effective in RA [38].  
495 Therefore, we envisage a certain role of Th17.1 in the activity of RA even during ABA  
496 treatment in non-responders. CTLA-4 molecule is a strong negative regulator of T cell  
497 immune response [39,40] and plays the central role in Treg's regulatory function [36]. More  
498 interestingly, it was recently reported that ex-Th17, which has the same phenotype as Th17.1,  
499 is not restricted by Treg suppression [41]. Based on these facts and the results of this study, it  
500 is suggested that Th17.1 cells play a role in disrupting immune tolerance by CTLA-4 and  
501 Treg. Currently, it is possible to induce clinical remission in some patients with RA using  
502 biological DMARDs or targeted synthetic DMARDs. However, when targeting immunologic  
503 remission, immunological factors as therapeutic targets still remain unknown. Immunological  
504 remission can be achieved by the inactivation or suppression of inflammation-sustaining  
505 pathological factors, such as autoreactive-T-cells, via endogenous immune regulatory  
506 mechanisms, such as CTLA-4 or Treg. Although further biological studies are needed to  
507 assess whether Th17.1 is resistant to the repression of CTLA-4-Ig, our study suggests that  
508 Th17.1 cells serve as potential novel therapeutic targets for achieving immunologic  
509 remission.

510

## 511 **Conclusions**

512 The present study demonstrated that the proportion of circulating Th17.1 cells showed  
513 differences in immunological quality that determine the therapeutic response to ABA in

514 patients with RA. A vast array of anti-rheumatic drugs is currently available for the treatment  
515 of RA. The identification of the most appropriate drug for individual patients is a key  
516 imperative to achieve early improvement. The identification of Th17.1 as a good candidate  
517 biomarker of the therapeutic response to ABA may represent an important step in the pursuit  
518 of precision medicine.

519

## 520 **Author contributions**

521 SM conceived, designed the study, performed data analysis, and wrote the manuscript. SO  
522 contributed to determining statistical methods for data analysis and statistical programming  
523 and interpretation and assisted in the preparation of the manuscript. SM and TM performed  
524 all flow cytometric analyses, and SM and TT conducted an experiment of MDR-1 activity  
525 assay. ST helped with obtaining patient's blood samples. All other authors have contributed  
526 to data collection and interpretation and have critically reviewed the manuscript. All authors  
527 have approved the final version of the manuscript.

528

## 529 **Acknowledgements**

530 We thank Mrs. Y. Sato and R. Uemura for the help in collecting patients' blood  
531 samples. The authors would like to thank the patients who participated in this study and all  
532 members of our laboratory for the meaningful discussions.

533

## 534 **References**

535 1. Smolen JS, Aletaha D, McInnes IB. Rheumatoid arthritis. *Lancet*. 2016;388: 2023-2038. doi:  
536 10.1016/S0140-6736(16)30173-8



- 537 2. Felson DT, Smolen JS, Wells G, Zhang B, Van Tuyl LHD, Funovits J, et al. American  
538 College of Rheumatology/European League Against Rheumatism provisional definition of  
539 remission in rheumatoid arthritis for clinical trials. *Arthritis Rheum.* 2011;63: 573-586. doi:  
540 [10.1002/art.30129](https://doi.org/10.1002/art.30129).
- 541 3. Van Tuyl LHD, Vlad SC, Felson DT, Wells G, Boers M. Defining remission in rheumatoid  
542 arthritis: results of an initial American College of Rheumatology/European League Against  
543 Rheumatism consensus conference. *Arthritis Rheum.* 2009;61: 704-710. doi:  
544 [10.1002/art.24392](https://doi.org/10.1002/art.24392).
- 545 4. McInnes IB, Schett G. The pathogenesis of rheumatoid arthritis. *N Engl J Med.* 2007;365:  
546 2205-2219. doi: [10.1056/NEJMra1004965](https://doi.org/10.1056/NEJMra1004965).
- 547 5. Kremer JM, Westhovens R, Leon M, Di Giorgio E, Alten R, Steinfeld S, et al. Treatment of  
548 rheumatoid arthritis by selective inhibition of T-cell activation with fusion protein CTLA4Ig.  
549 *N Engl J Med.* 2003;349: 1907-1915. doi: [10.1056/NEJMoa035075](https://doi.org/10.1056/NEJMoa035075).
- 550 6. Kremer JM, Genant HK, Moreland LW, Russell AS, Emery P, Abud-Mendoza C, et al.  
551 Effects of abatacept in patients with methotrexate-resistant active rheumatoid arthritis: a  
552 randomized trial. *Ann Intern Med.* 2006;144: 865-876. doi:  
553 [10.7326/0003-4819-144-12-200606200-00003](https://doi.org/10.7326/0003-4819-144-12-200606200-00003).
- 554 7. Maxwell LJ, Singh JA. Abatacept for rheumatoid arthritis: A cochrane systematic review. *J*  
555 *Rheumatol.* 2010;37: 234-245. doi: [10.3899/jrheum.091066](https://doi.org/10.3899/jrheum.091066).
- 556 8. Hirota K, Hashimoto M, Yoshitomi H, Tanaka S, Nomura T, Yamaguchi T, et al. T cell  
557 self-reactivity forms a cytokine milieu for spontaneous development of IL-17+ Th cells that  
558 cause autoimmune arthritis. *J Exp Med.* 2007;204: 41-47. doi: [10.1084/jem.20062259](https://doi.org/10.1084/jem.20062259).
- 559 9. Hirota K, Yoshitomi H, Hashimoto M, Maeda S, Teradaira S, Sugimoto N, et al. Preferential  
560 recruitment of CCR6-expressing Th17 cells to inflamed joints via CCL20 in rheumatoid  
561 arthritis and its animal model. *J Exp Med.* 2007;204: 2803-2812. doi: [10.1084/jem.20071397](https://doi.org/10.1084/jem.20071397).
- 562 10. Bettelli E, Korn T, Oukka M, Kuchroo VK. Induction and effector functions of T(H)17 cells.  
563 *Nature.* 2008;453: 1051-1057. doi: [10.1038/nature07036](https://doi.org/10.1038/nature07036).

- 564 11. Kochi Y, Okada Y, Suzuki A, Ikari K, Terao C, Takahashi A, et al. A regulatory variant in  
565 CCR6 is associated with rheumatoid arthritis susceptibility. *Nat Genet.* 2010;42: 515-519.  
566 [doi: 10.1038/ng.583](https://doi.org/10.1038/ng.583).
- 567 12. Paulissen SMJ, van Hamburg JP, Dankers W, Lubberts E. The role and modulation of CCR6+  
568 Th17 cell populations in rheumatoid arthritis. *Cytokine.* 2015;74: 43-53. [doi:](https://doi.org/10.1016/j.cyto.2015.02.002)  
569 [10.1016/j.cyto.2015.02.002](https://doi.org/10.1016/j.cyto.2015.02.002).
- 570 13. Ramesh R, Kozhaya L, McKeivitt K, Djuretic IM, Carlson TJ, Quintero MA, et al.  
571 Pro-inflammatory human Th17 cells selectively express P-glycoprotein and are refractory to  
572 glucocorticoids. *J Exp Med.* 2014;211: 89-104. [doi: 10.1084/jem.20130301](https://doi.org/10.1084/jem.20130301).
- 573 14. van Hamburg JP, Tas SW. Molecular mechanisms underpinning T helper 17 cell  
574 heterogeneity and functions in rheumatoid arthritis. *J Autoimmun.* 2018;87: 69-81. [doi:](https://doi.org/10.1016/j.jaut.2017.12.006)  
575 [10.1016/j.jaut.2017.12.006](https://doi.org/10.1016/j.jaut.2017.12.006).
- 576 15. Chikanza IC, Kozaci DL. Corticosteroid resistance in rheumatoid arthritis: molecular and  
577 cellular perspectives. *Rheumatology.* 2004;43: 1337-1345. [doi:](https://doi.org/10.1093/rheumatology/keh333)  
578 [10.1093/rheumatology/keh333](https://doi.org/10.1093/rheumatology/keh333).
- 579 16. Firestein GS, McInnes IB. Immunopathogenesis of rheumatoid arthritis. *Immunity.* 2017;46:  
580 183-196. [doi: 10.1016/j.immuni.2017.02.006](https://doi.org/10.1016/j.immuni.2017.02.006).
- 581 17. Nakayamada S, Kubo S, Yoshikawa M, Miyazaki Y, Yunoue N, Iwata S, et al. Differential  
582 effects of biological DMARDs on peripheral immune cell phenotypes in patients with  
583 rheumatoid arthritis. *Rheumatology.* 2018;57: 164-174. [doi: 10.1093/rheumatology/kex012](https://doi.org/10.1093/rheumatology/kex012).
- 584 18. Ermann J, Rao DA, Teslovich NC, Brenner MB, Raychaudhuri S. Immune cell profiling to  
585 guide therapeutic decisions in rheumatic diseases. *Nat Rev Rheumatol.* 2015;11: 541–551.  
586 [doi: 10.1038/nrrheum.2015.71](https://doi.org/10.1038/nrrheum.2015.71).
- 587 19. Falconer J. Toward cellular biomarkers for rheumatoid arthritis. *Rheumatology (Oxford).*  
588 2018; 57: 10–11. [doi: 10.1093/rheumatology/kex283](https://doi.org/10.1093/rheumatology/kex283).
- 589 20. Arnett FC, Edworthy SM, Bloch DA, Mcshane DJ, Fries JF, Cooper NS, et al. The American  
590 Rheumatism Association 1987 revised criteria for the classification of rheumatoid arthritis.  
591 *Arthritis Rheum.* 1988;31: 315-324.

- 592 21. Inoue E, Yamanaka H, Hara M, Tomatsu T, Kamatani N. Comparison of Disease Activity  
593 Score (DAS)28-erythrocyte sedimentation rate and DAS28-C-reactive protein threshold  
594 values. *Ann Rheum Dis.* 2007;66: 407-409. [doi: 10.1136/ard.2006.054205](https://doi.org/10.1136/ard.2006.054205).
- 595 22. Austin PC. The performance of different propensity score methods for estimating marginal  
596 hazard ratios. *Stat Med.* 2013;32: 2837-2849. [doi: 10.1002/sim.5705](https://doi.org/10.1002/sim.5705).
- 597 23. Joffe MM, Rosenbaum PR. Invited commentary: propensity scores. *Am J Epidemiol.*  
598 1999;150: 327-333. [doi: 10.1093/oxfordjournals.aje.a010011](https://doi.org/10.1093/oxfordjournals.aje.a010011).
- 599 24. Nagafuji K, Matsuo K, Teshima T, Mori S, Sakamaki H, Hidaka M, Ogawa H, et al.  
600 Peripheral blood stem cell versus bone marrow transplantation from HLA-identical sibling  
601 donors in patients with leukemia: a propensity score-based comparison from the Japan  
602 Society for Hematopoietic Stem Cell Transplantation registry. *Int J Hematol.* 2010;91:  
603 855-864. [doi: 10.1007/s12185-010-0581-1](https://doi.org/10.1007/s12185-010-0581-1).
- 604 25. Kanda Y. Investigation of the freely available easy-to-use software “EZR” for medical  
605 statistics. *Bone Marrow Transplant.* 2013;48: 452-458. [doi: 10.1038/bmt.2012.244](https://doi.org/10.1038/bmt.2012.244).
- 606 26. Lumley T. Analysis of complex survey samples. *J Stat Soft.* 2004;9: 1-19. [doi:](https://doi.org/10.18637/jss.v009.i08)  
607 [10.18637/jss.v009.i08](https://doi.org/10.18637/jss.v009.i08).
- 608 27. Wickham H. *ggplot2: elegant graphics for data analysis*. New York: Springer-Verlag New  
609 York; 2009.
- 610 28. Maecker HT, McCoy JP, Nussenblatt R. Standardizing immunophenotyping for the Human  
611 Immunology Project. *Nat Rev Immunol.* 2012;12: 191-200. [doi: 10.1038/nri3158](https://doi.org/10.1038/nri3158).
- 612 29. Kubo S, Saito K, Hirata S, Fukuyo S, Yamaoka K, Sawamukai N, et al. Abatacept inhibits  
613 radiographic progression in patients with rheumatoid arthritis: a retrospective analysis of  
614 6 months of abatacept treatment in routine clinical practice, The ALTAIR Study. *Mod*  
615 *Rheumatol.* 2014;24: 42-51. [doi: 10.3109/14397595.2013.854051](https://doi.org/10.3109/14397595.2013.854051).
- 616 30. Harigai M, Ishiguro N, Inokuma S, Mimori T, Ryu J, Takei S, et al. Postmarketing  
617 surveillance of the safety and effectiveness of abatacept in Japanese patients with rheumatoid  
618 arthritis. *Mod. Rheumatol.* 2016;26: 491-498. [doi: 10.3109/14397595.2015.1123211](https://doi.org/10.3109/14397595.2015.1123211).

- 619 31. Gottenberg JE, Ravaud P, Cantagrel A, Combe B, Flipo RM, Schaeffer T, et al. Positivity  
620 for anti-cyclic citrullinated peptide is associated with a better response to abatacept: data from  
621 the “Orencia and rheumatoid arthritis” registry. *Ann Rheum Dis*. 2012;71: 1815-1819. doi:  
622 [10.1136/annrheumdis-2011-201109](https://doi.org/10.1136/annrheumdis-2011-201109).
- 623 32. Leffers HC, Ostergaard M, Glinborg B, Krogh NS, Foged H, Tarp U, et al. Efficacy of  
624 abatacept and tocilizumab in patients with rheumatoid arthritis treated in clinical practice:  
625 results from the nationwide Danish DANBIO registry. *Ann Rheum Dis*. 2011;70: 1216-1222.  
626 doi: [10.1136/ard.2010.140129](https://doi.org/10.1136/ard.2010.140129).
- 627 33. Piantoni S, Colombo E, Tincani A, Airò P, Scarsi M. Predictive factors of abatacept therapy  
628 discontinuation in patients with rheumatoid arthritis. *Clin Rheumatol*. 2016;35: 1065-1069.  
629 doi: [10.1007/s10067-016-3185-1](https://doi.org/10.1007/s10067-016-3185-1).
- 630 34. Scarsi M, Ziglioli T, Airo' P. Baseline numbers of circulating CD28-negative T cells may  
631 predict clinical response to abatacept in patients with rheumatoid arthritis. *J Rheumatol*.  
632 2011;38: 2105-2111. doi: [10.3899/jrheum.110386](https://doi.org/10.3899/jrheum.110386).
- 633 35. Scarsi M, Zanotti C, Chiarini M, Imberti L, Piantoni S, Frassi M, et al. Reduction of  
634 peripheral blood T cells producing IFN- $\gamma$  and IL-17 after therapy with abatacept for  
635 rheumatoid arthritis. *Clin Exp Rheumatol*. 2014;32: 204-210.
- 636 36. Wing K, Onishi Y, Prieto-Martin P, Yamaguchi T, Miyara M, Fehervari Z, et al. CTLA-4  
637 control over Foxp3+ regulatory T cell function. *Science*. 2008;322: 271-275. doi:  
638 [10.1126/science.1160062](https://doi.org/10.1126/science.1160062).
- 639 37. Penatti A, Facciotti F, De Matteis R, Larghi P, Paroni M, Murgio A, et al. Differences in  
640 serum and synovial CD4+ T cells and cytokine profiles to stratify patients with inflammatory  
641 osteoarthritis and rheumatoid arthritis. *Arthritis Res Ther*. 2017;19: 103. doi:  
642 [10.1186/s13075-017-1305-1](https://doi.org/10.1186/s13075-017-1305-1).
- 643 38. Behrens F, Tak PP, Østergaard M, Stoilov R, Wiland P, Huizinga TW, et al. MOR103, a  
644 human monoclonal antibody to granulocyte–macrophage colony-stimulating factor, in the  
645 treatment of patients with moderate rheumatoid arthritis: results of a phase Ib/IIa randomised,

- 646 double-blind, placebo-controlled, dose-escalation trial. *Ann Rheum Dis.* 2015;74: 1058-1064.  
647 doi: [10.1136/annrheumdis-2013-204816](https://doi.org/10.1136/annrheumdis-2013-204816).
- 648 39. Waterhouse P, Penninger JM, Timms E, Wakeham A, Shahinian A, Lee KP, et al.  
649 Lymphoproliferative disorders with early lethality in mice deficient in Ctla-4. *Science.* 1995;  
650 270: 985-988. doi: [10.1126/science.270.5238.985](https://doi.org/10.1126/science.270.5238.985).
- 651 40. Tivol EA, Borriello F, Schweitzer AN, Lynch WP, Bluestone JA, Sharpe AH. Loss of  
652 CTLA-4 leads to massive lymphoproliferation and fatal multiorgan tissue destruction,  
653 revealing a critical negative regulatory role of CTLA-4. *Immunity.* 1995;3: 541-547. doi:  
654 [10.1016/1074-7613\(95\)90125-6](https://doi.org/10.1016/1074-7613(95)90125-6).
- 655 41. Basdeo SA, Cluxton D, Sulaimani J, Moran B, Canavan M, Orr C, et al. Ex-Th17  
656 (nonclassical Th1) cells are functionally distinct from classical Th1 and Th17 cells and are  
657 not constrained by regulatory T cells. *J Immunol.* 2017;198: 2249-2259. doi:  
658 [10.4049/jimmunol.1600737](https://doi.org/10.4049/jimmunol.1600737).
- 659  
660

661

## 663 **Supporting information**

664

665 **S1 Fig. The proportion of cells with Ki67 expression among circulating CD4+ Th**  
666 **subsets in patients with RAPBMCs** from RA (n = 26, before abatacept treatment) were  
667 stained for CD4, CXCR3, CCR4, CD161, CCR6, CD25, Foxp3, and Ki67 mAbs and  
668 analyzed using flow cytometry. The percentage of Ki67+ cells in the indicated Th subsets are  
669 shown by box plot. Data were analyzed using Kruskal–Wallis test followed by the Mann–  
670 Whitney U test using Bonferroni correction.

671

672 **S2 Fig. Change in cell proliferation state of Th17 and Th17.1 subsets by ABA treatment.**

673 The graph shows changes in the proportion of cells with Ki67 expression among each Th  
674 subset induced by ABA treatment at various time-points (0, 4, and 24 weeks, n = 29).

675 Data were analyzed using Friedman rank sum test. Wilcoxon signed rank test with  
676 Bonferroni correction was used for post-hoc paired comparisons.

677

678 **S3 Fig. Th17.1 level and successive changes in disease activity score.**

679 **a.** The line graph shows the transition of the disease activity (DAS28-CRP) of RA in the Th  
680 17.1-lower and Th 17.1-higher groups before and after ABA treatment (at 4, 12, and 24  
681 weeks). P-values (vs. Th17.1-higher) were determined with Mann–Whitney U test using  
682 Bonferroni correction. **b.** 100% stacked bar chart shows successive changes in DAS28-CRP  
683 in the Th17.1-lower, Th17.1-intermediate, and Th17.1-high groups before and after ABA  
684 treatment (at 4, 12, and 24 weeks).

685 ABA, abatacept; DAS28-CRP, disease activity score 28-joint count C-reactive protein; REM,  
686 remission; LDA, low disease activity; MDA, moderate disease activity; HDA, high disease

687 activity.

688

689 **S4 Fig. Th17.1 level and successive changes in CRP and MMP-3 levels.**

690 **a. b.** The line graphs show the transition of serum C-reactive protein (CRP) and  
691 metalloproteinase-3 (MMP-3) of rheumatoid arthritis in Th 17.1-lower and Th 17.1-higher  
692 groups before and after ABA treatment (at 4, 12, and 24 weeks). P-values (Th17.1-lower vs.  
693 Th17.1-higher) were determined using the Mann–Whitney U test.

694 **c.** 100% stacked bar chart shows MMP-3 titer (normal, moderate, and high) in Th17.1-low  
695 and Th17.1-high groups after ABA treatment at 24 weeks. P-values (Th17.1-lower vs.  
696 Th17.1-higher) were determined using Fisher’s exact test.

697 ABA, abatacept; CRP, C-reactive protein; MMP-3, metalloproteinase-3; Normal, within  
698 normal limit; Moderate titer, less than 3 times normal upper limit; High titer, more than 3  
699 times normal upper limit.

700

701 **S5 Fig. Estimation of Th17.1 cut-off value at baseline to predict ABA therapeutic**  
702 **response using ROC curve.**

703 **a.** ROC curve showing a cut-off Th17.1 (% in CD4+) level of 1.1% discriminated between  
704 GR and non-GR (MR or NR) at 24 weeks, with 79.2% sensitivity and 81.2% specificity.

705 **b.** ROC curve showing a cut-off Th17.1 level of 1.1% discriminated between REM and  
706 non-REM at 24 weeks, with 75.9% sensitivity and 100% specificity.

707 ROC, receiver operating characteristic; AUC, area under the curve; GR, good response; MR,  
708 moderate response; NR, no response; REM, remission.

709

710 **S6 Fig.** Correlation coefficient matrix plot shows the correlation (Spearman’s correlation  
711 coefficient,  $\rho$ ) of patient background factors, indicated T cell subset at baseline, and ABA

712 therapeutic response indicators with significance levels (p-value).

713

714 **S1 Table. Differences in baseline clinical characteristics between EULAR-GR and**  
715 **non-GR patients.**

716 **S2 Table. Exploratory analysis for optimal Th subset as the predictor of ABA treatment**  
717 **response using multivariate analysis.**

718 **S3 Table. Adjusted patient characteristics of Th17.1-lower and Th17.1-higher patients**  
719 **by IPW.**

720 **S4 Table. Logistic regression analysis using the IPW method to calculate odds ratio**  
721 **adjusted for patient characteristics.**

722



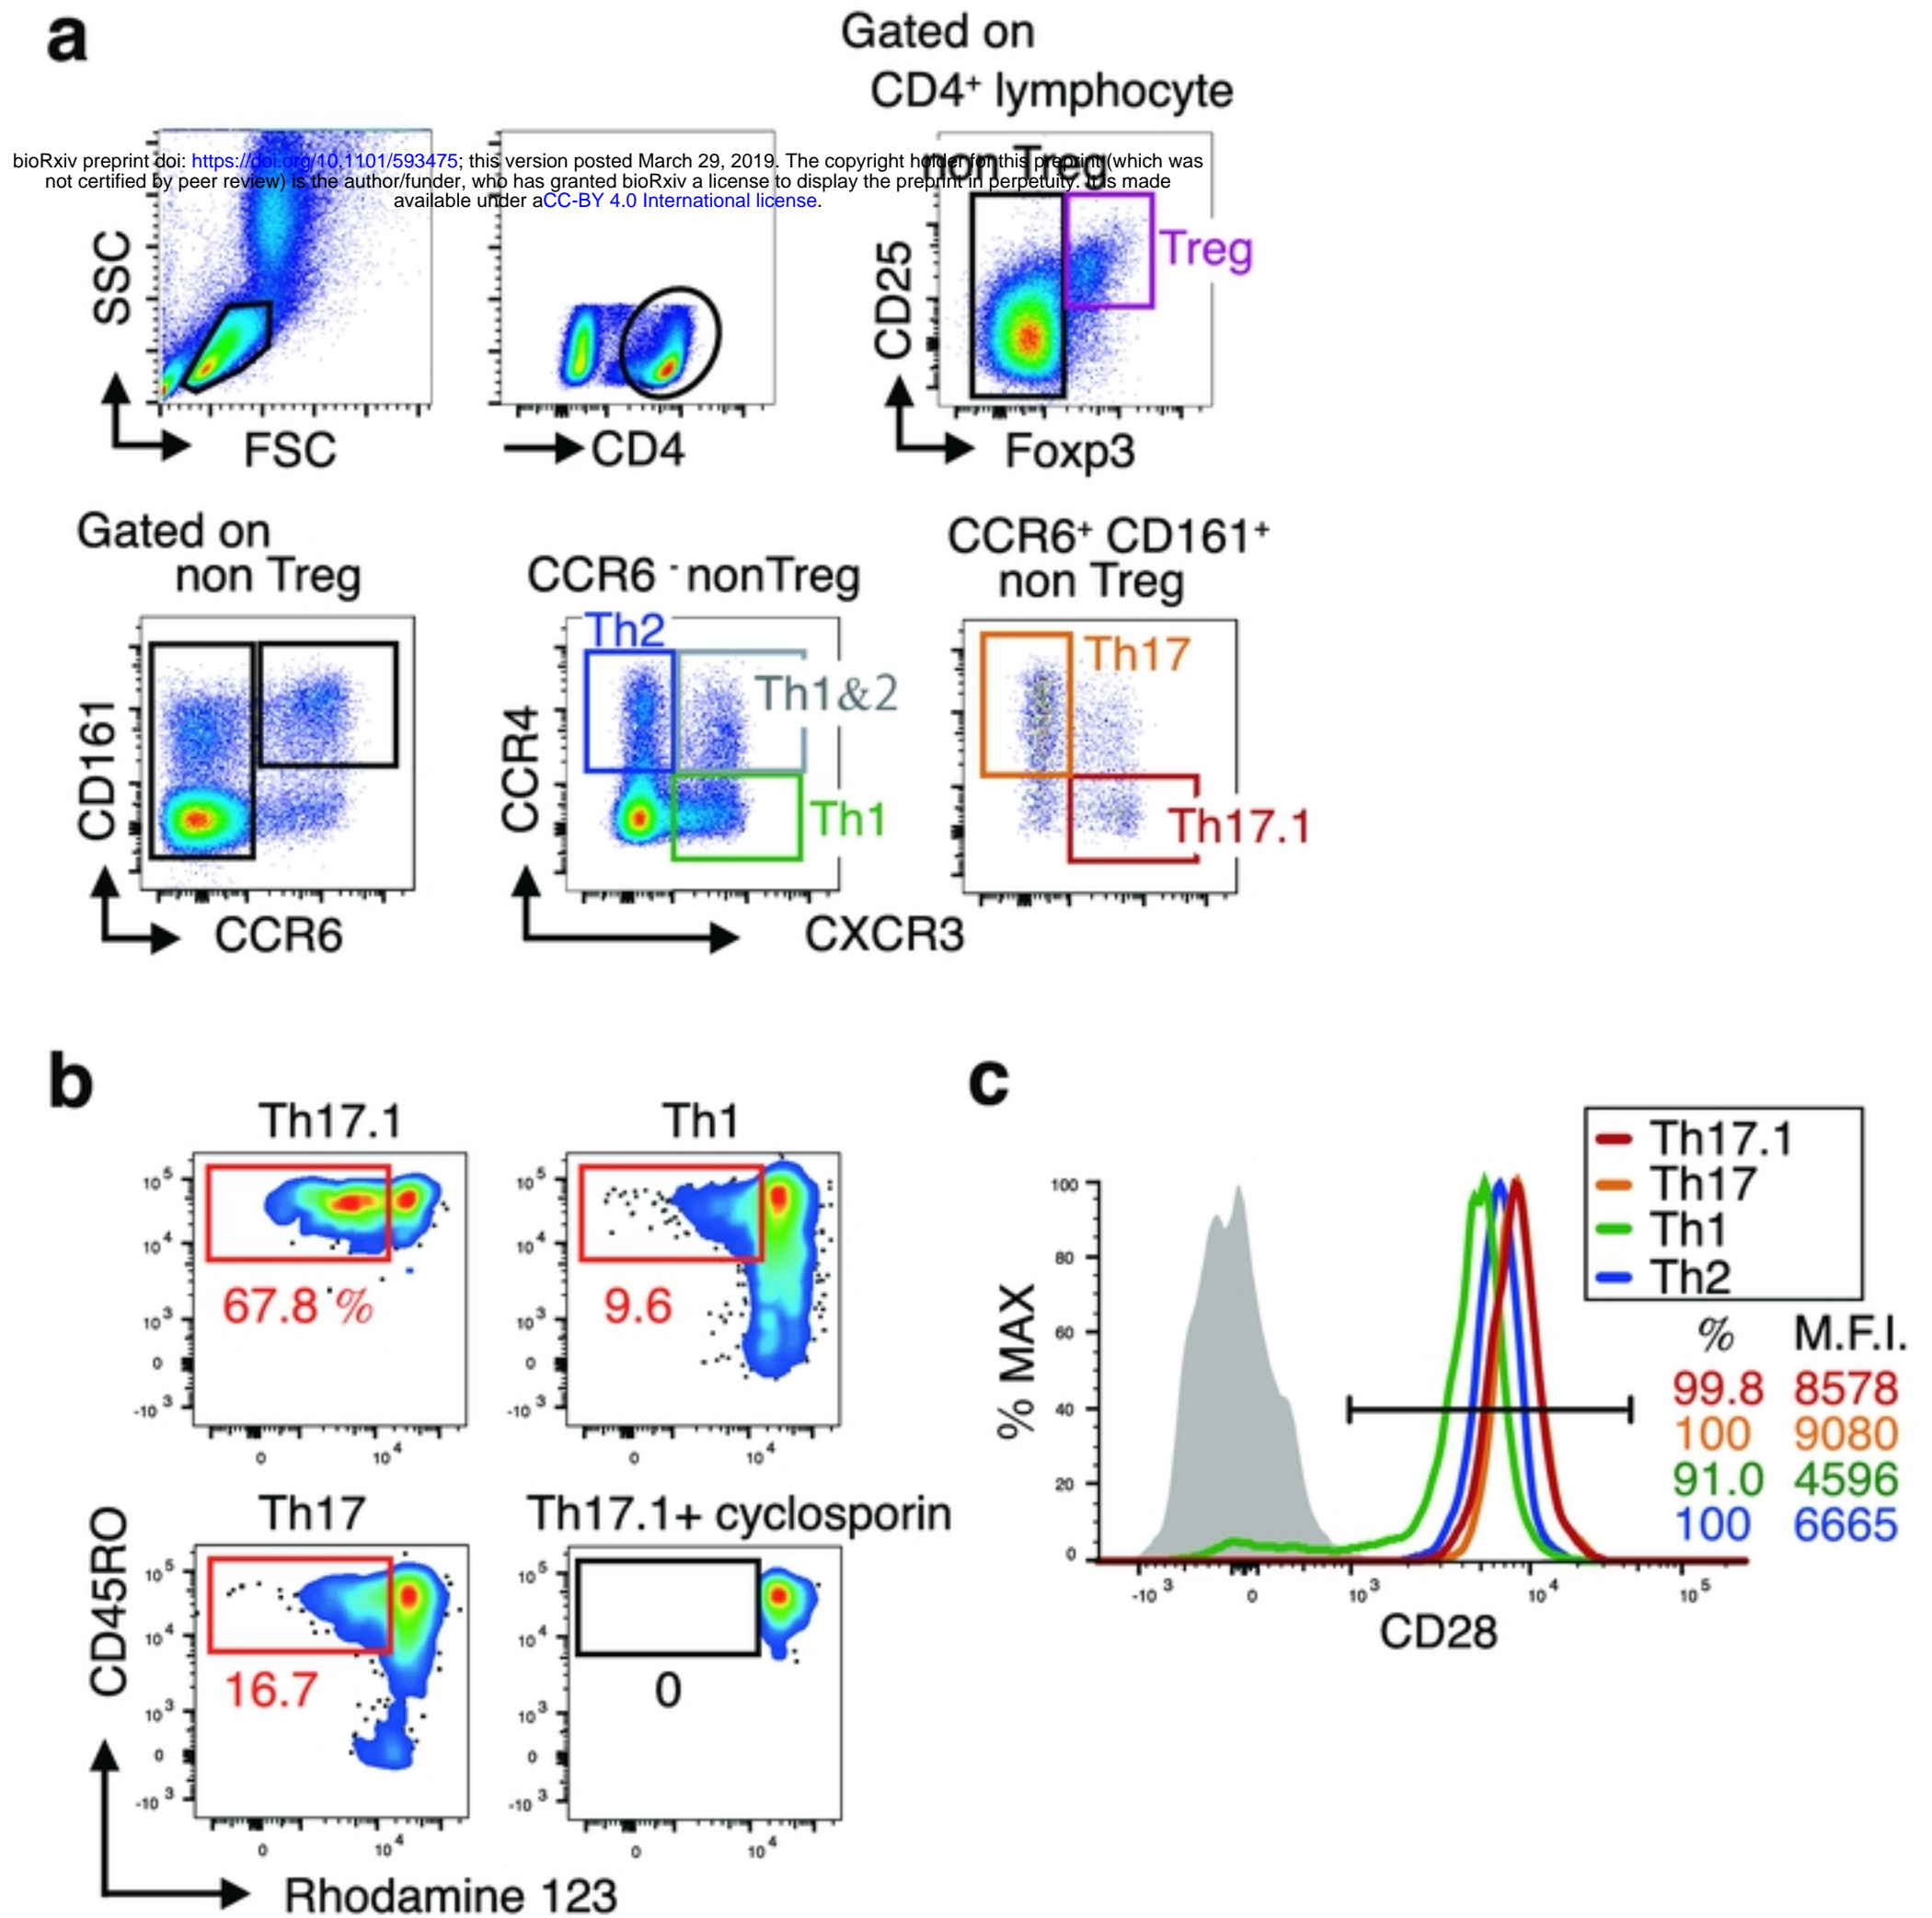

Figure 1

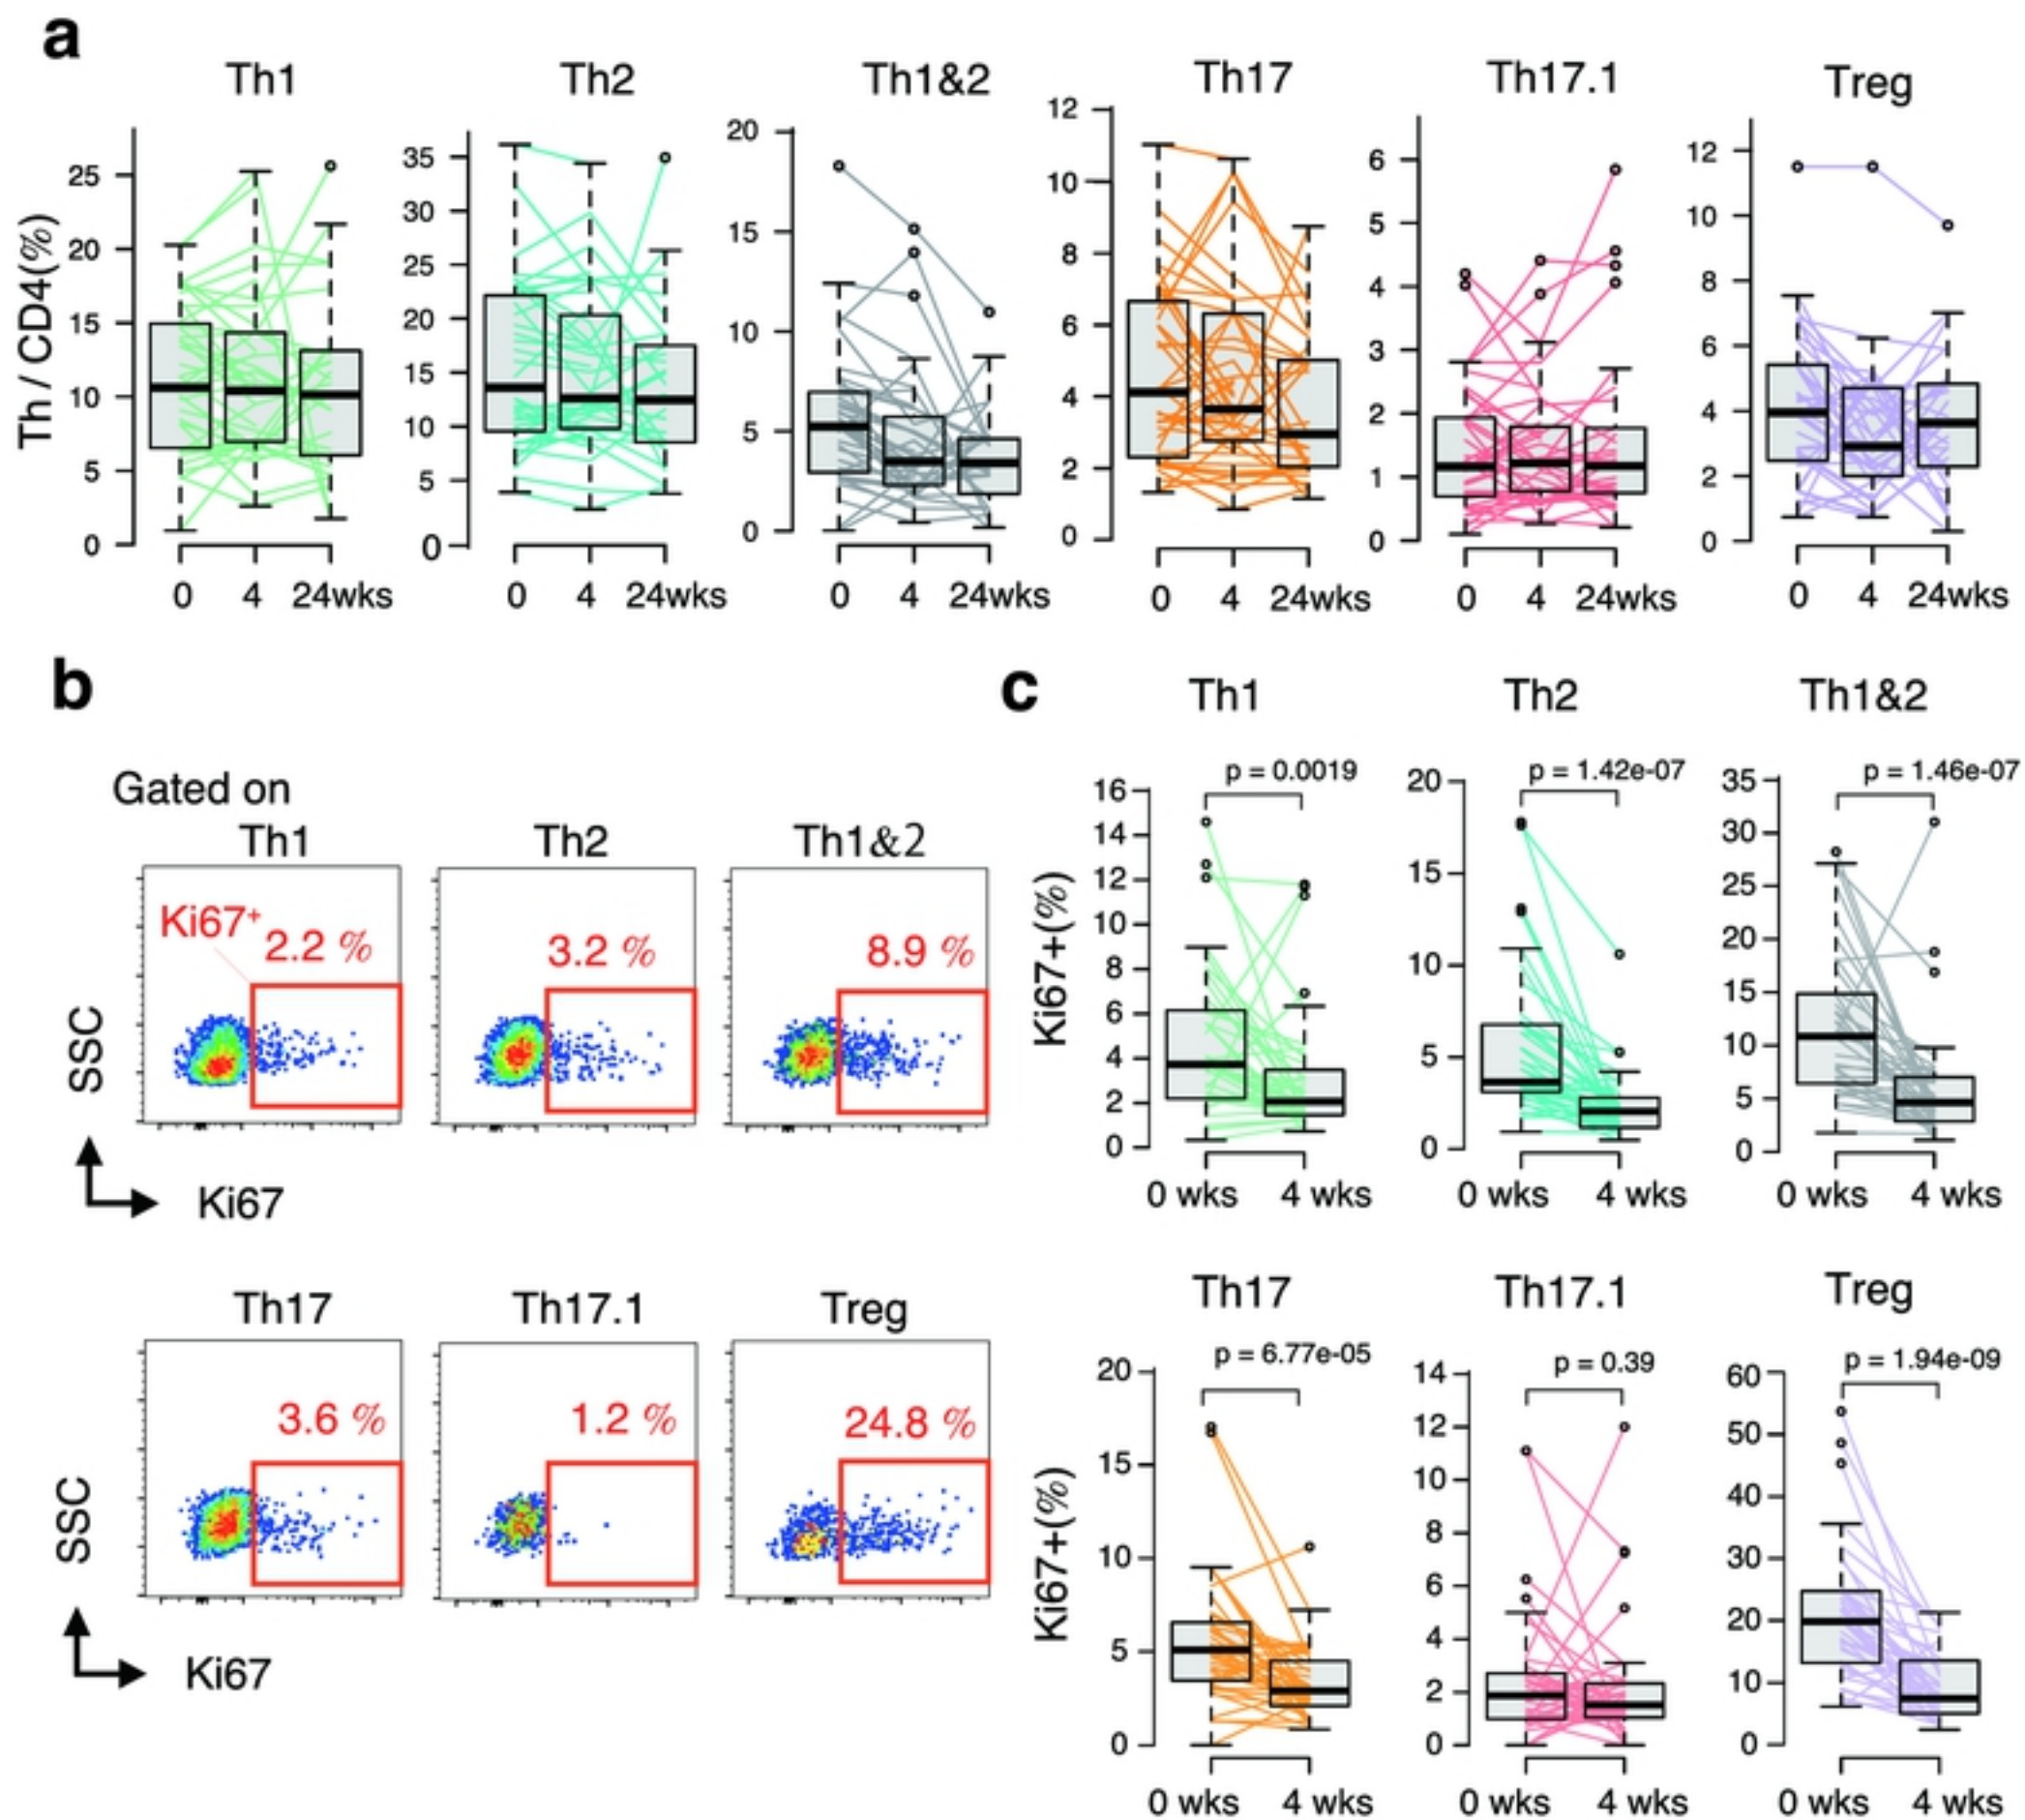

Figure 2

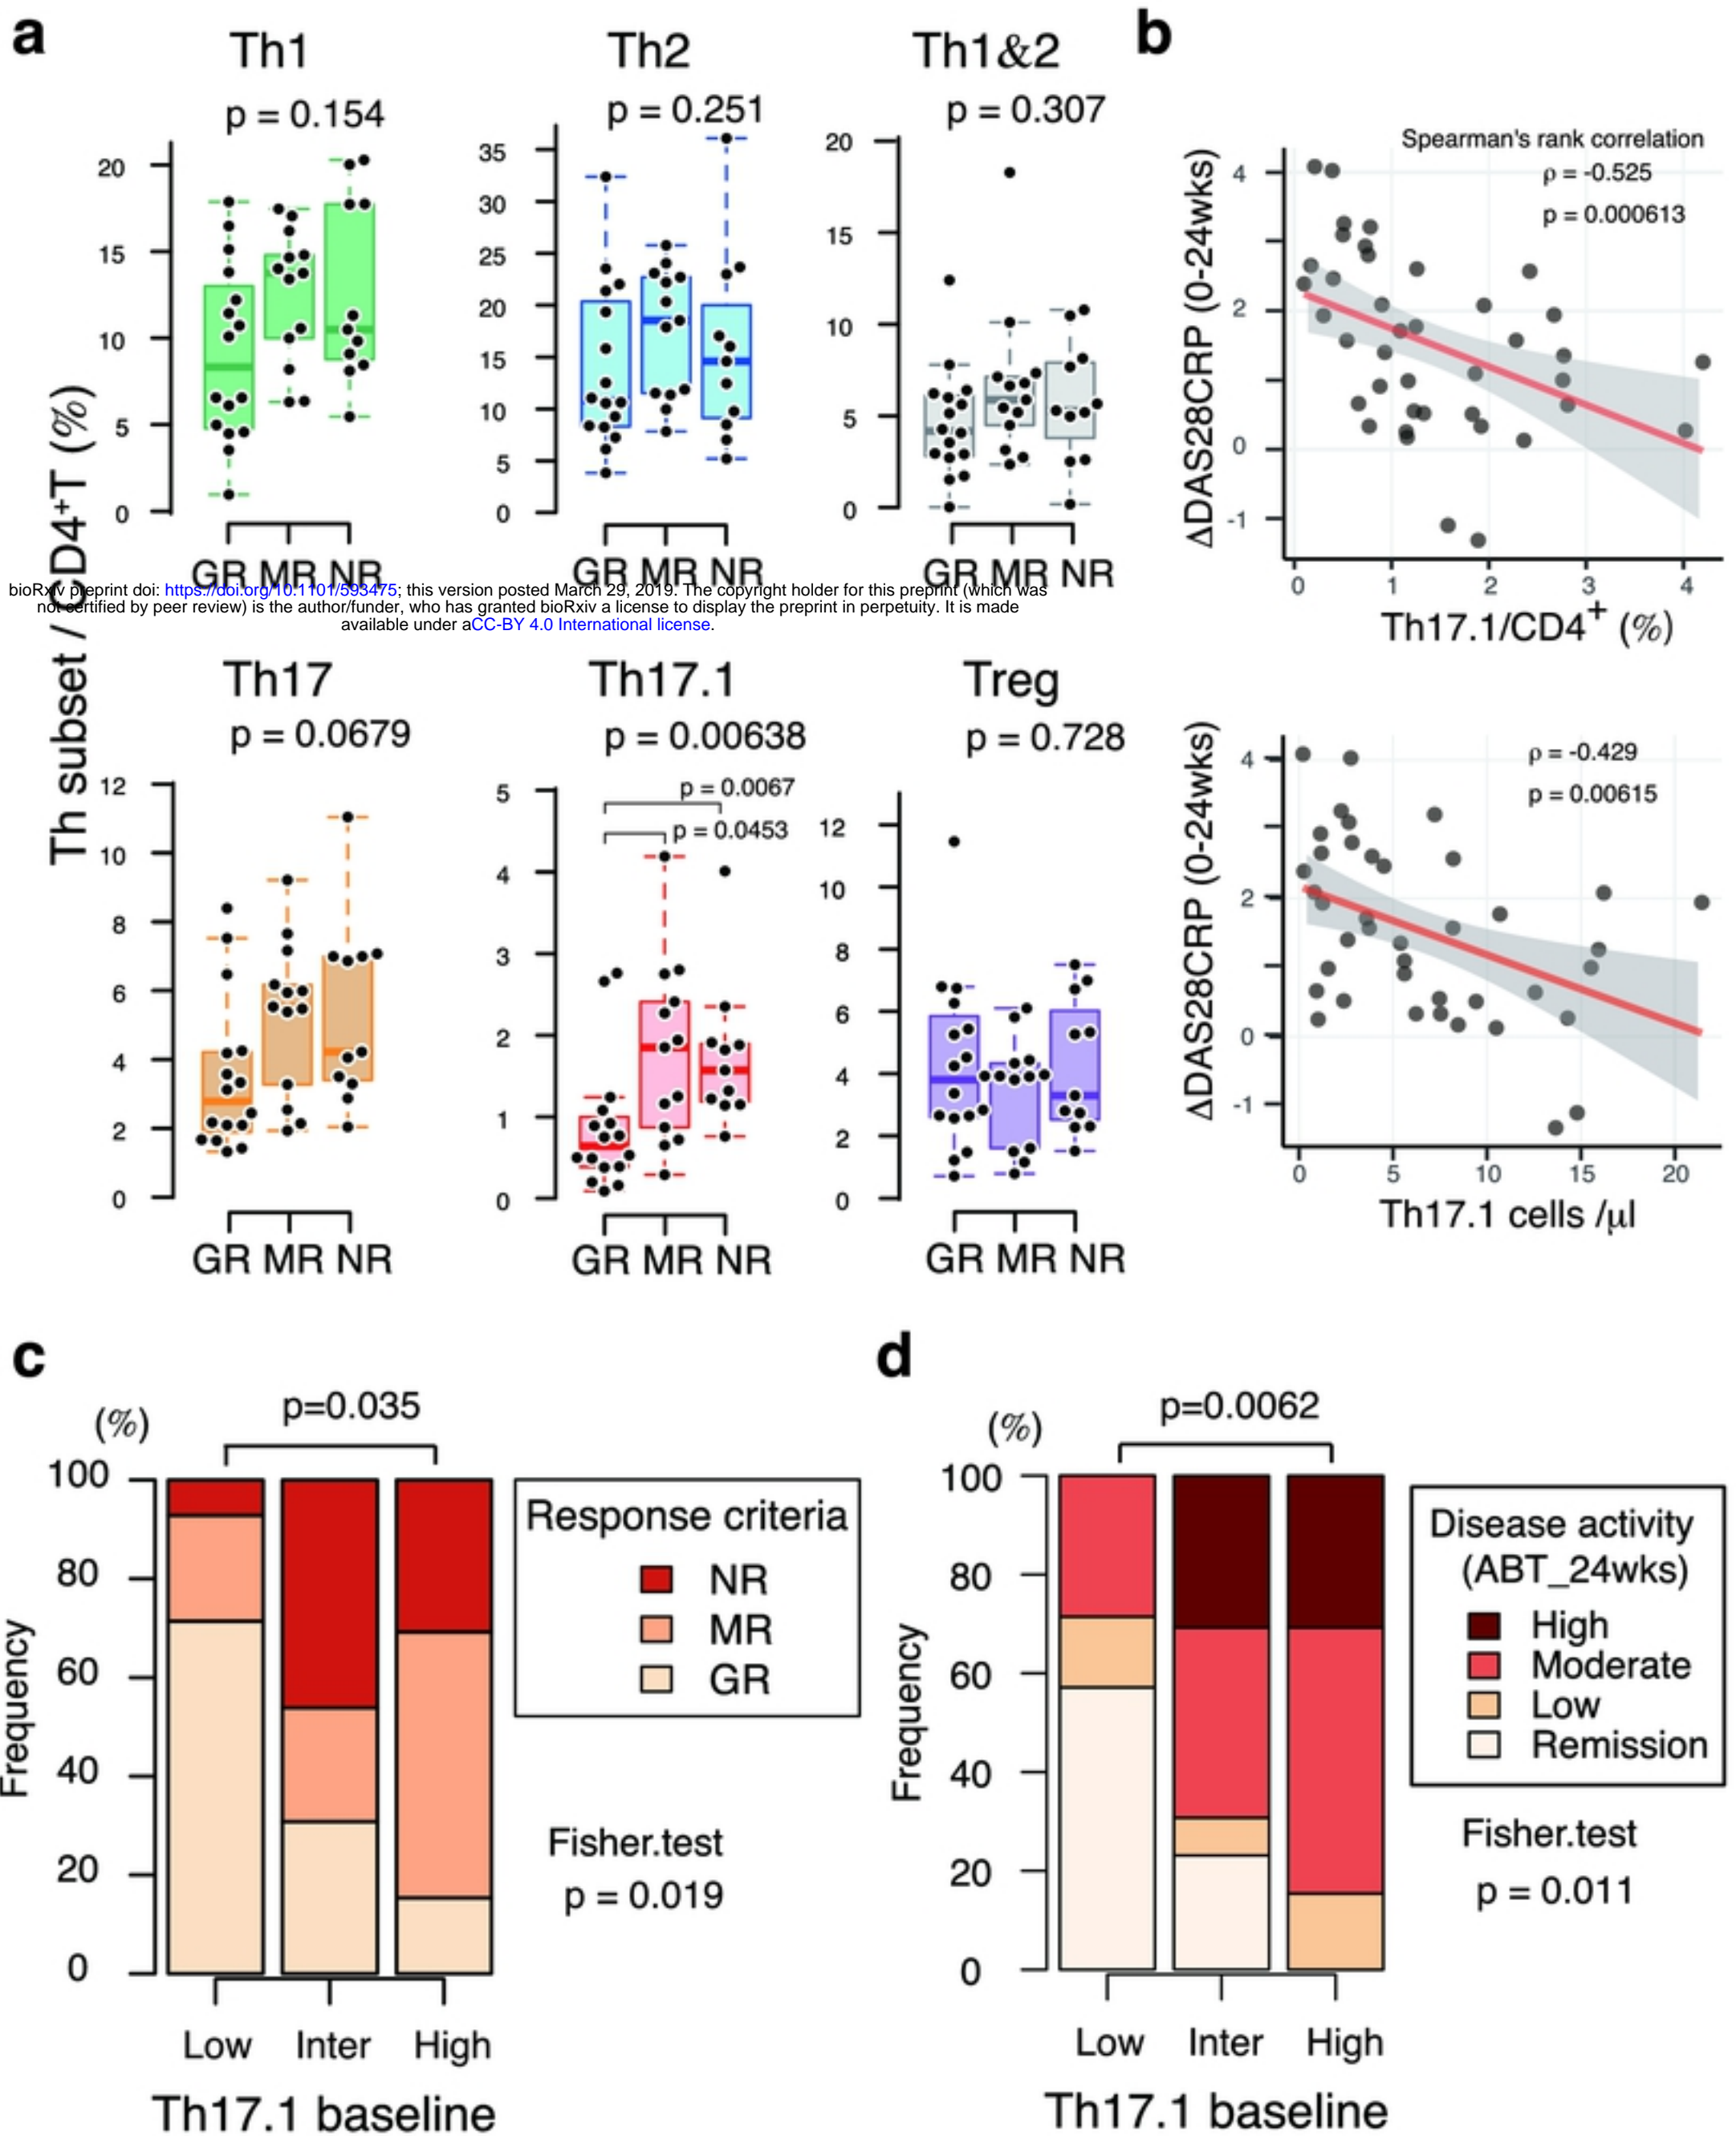

bioRxiv preprint doi: <https://doi.org/10.1101/593475>; this version posted March 29, 2019. The copyright holder for this preprint (which was not certified by peer review) is the author/funder, who has granted bioRxiv a license to display the preprint in perpetuity. It is made available under aCC-BY 4.0 International license.

Figure 3

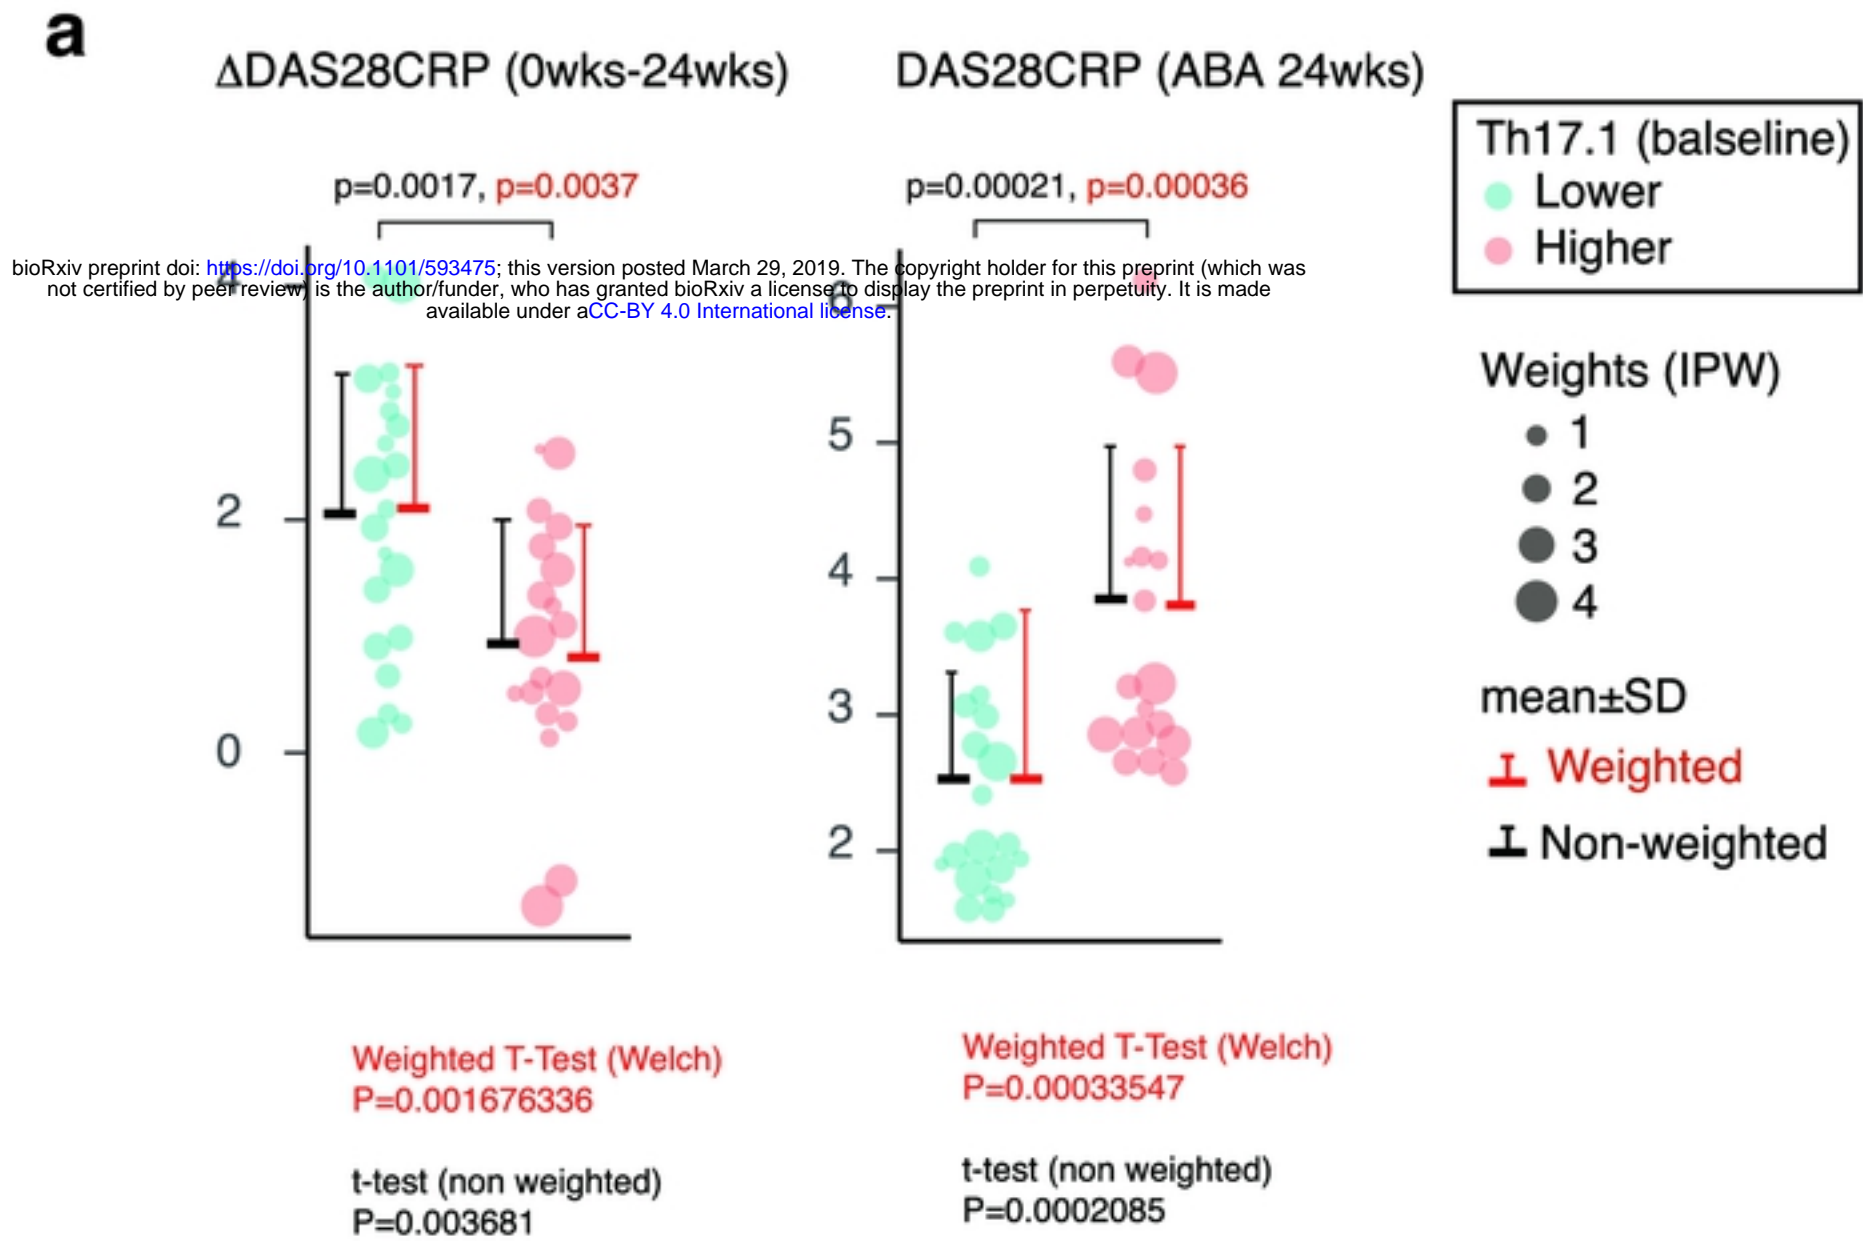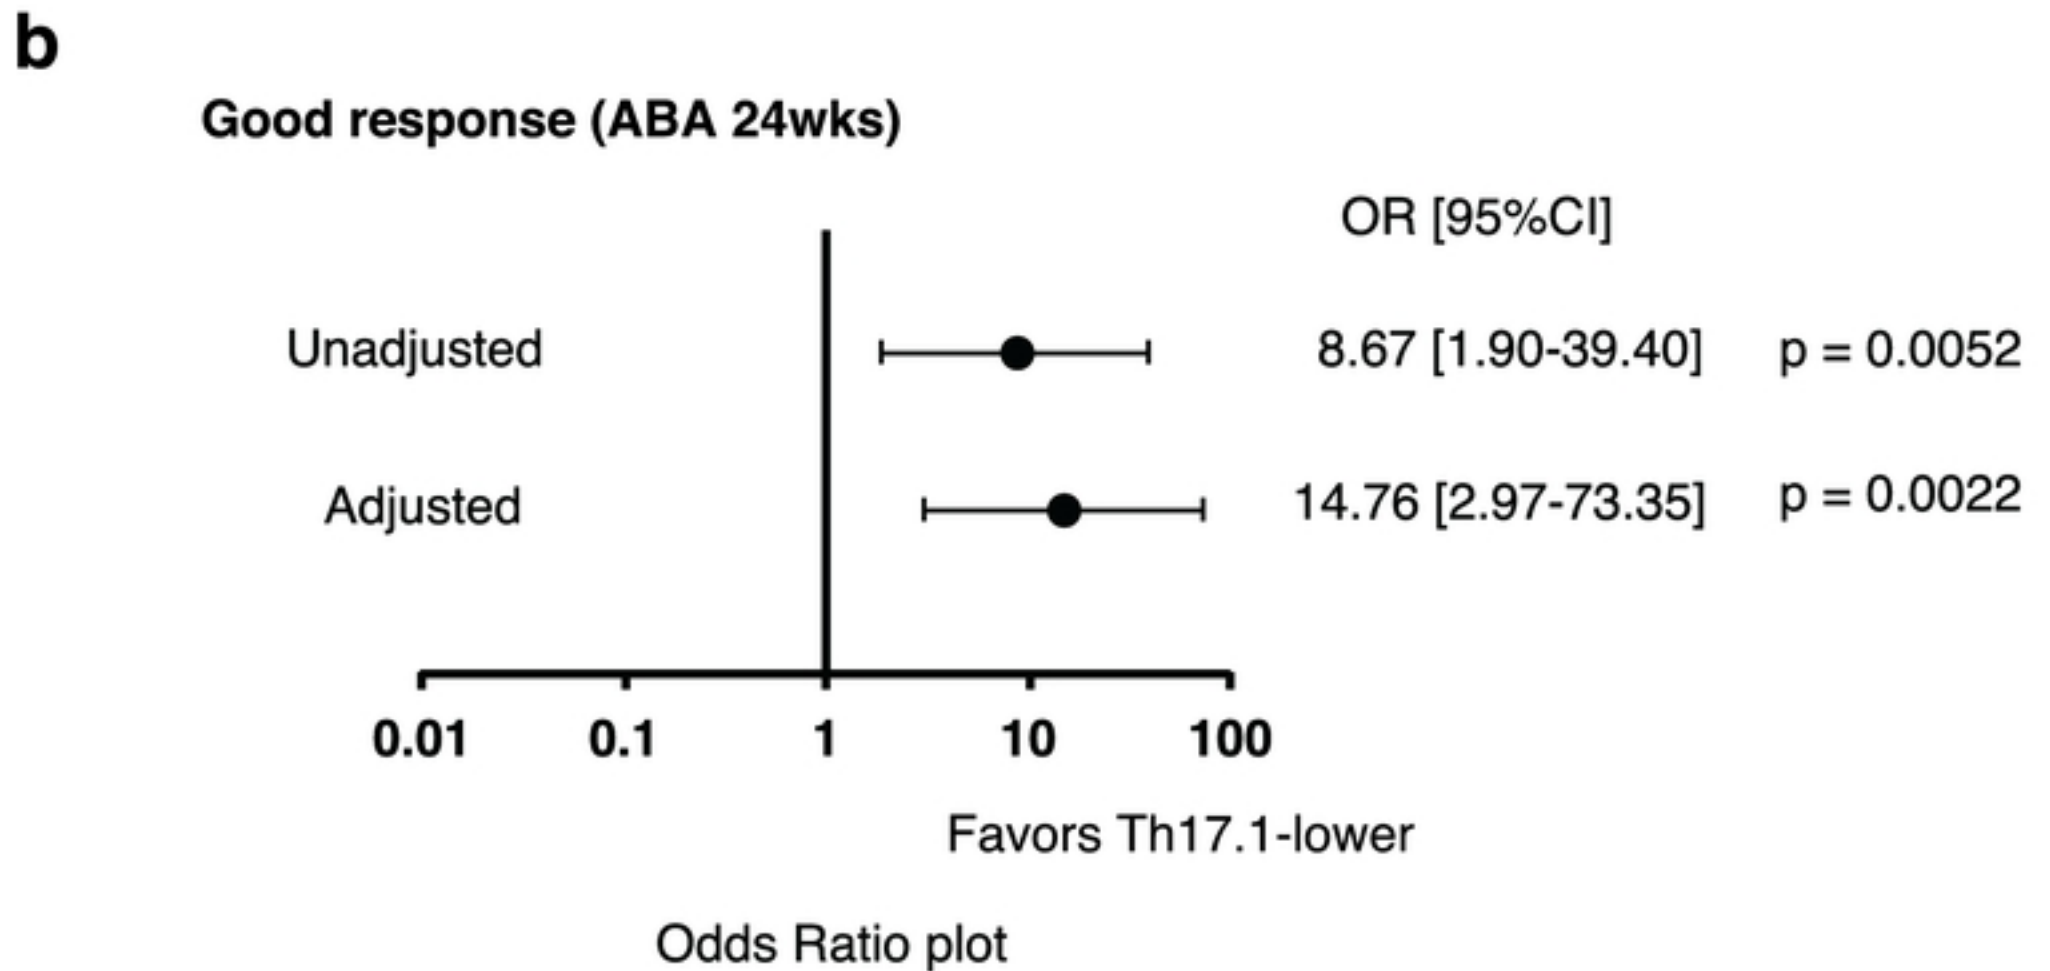

Figure 4
